# Supplementary material
Source: PubMed Central journal article supplement (PMC1283752)

**Supplemental data II.** Correspondence of fragment clusters (f.c.) derived by MMSR to mass spectral characteristics of the tomato fruit volatiles.

The 70 compounds shown in Table II of the text are presented. **a)** Mass spectrum reconstructed by MMSR: original intensities (Response) of fragments (ions,  $m/z$ ) plotted as an Excel chart; **b)** mass spectral model extracted from a GC/MS profile using AMDIS deconvolution based on MMSR results as described in the Materials and Methods; **c)** mass spectrum of the first matching hit derived from the NIST library for the mass spectral model obtained by the AMDIS deconvolution on **(b)**.

**Guaiacol (f.c. #162)\***

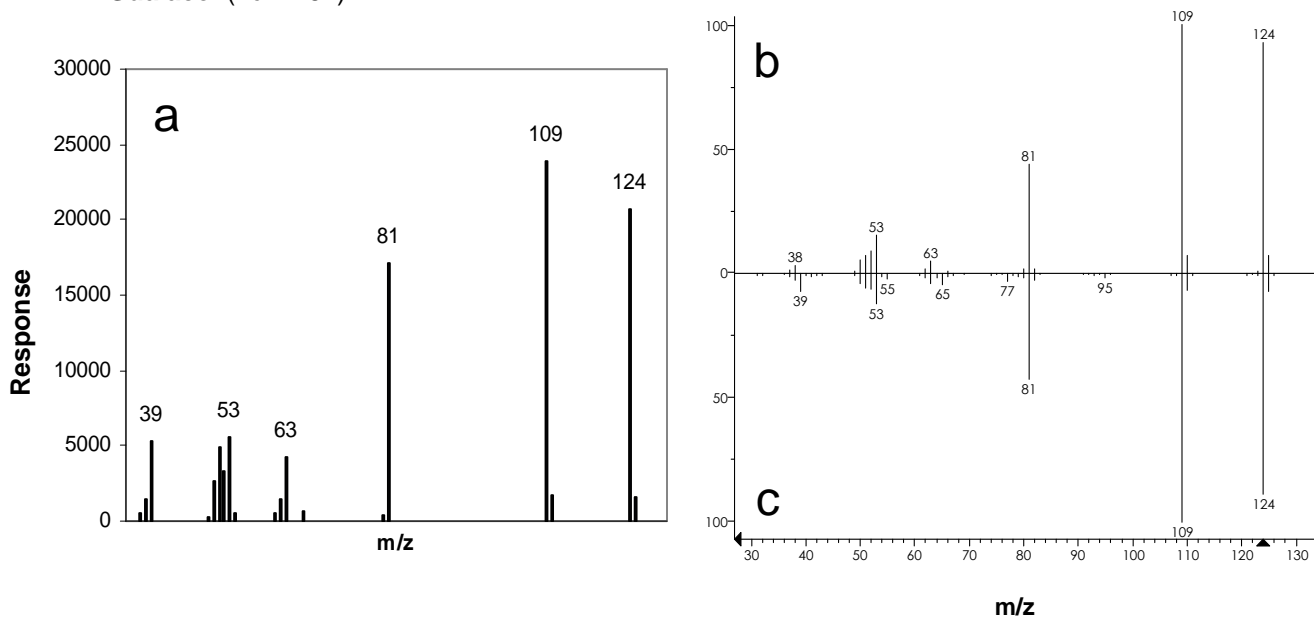

**Methyl salicylate (f.c. #226 )**

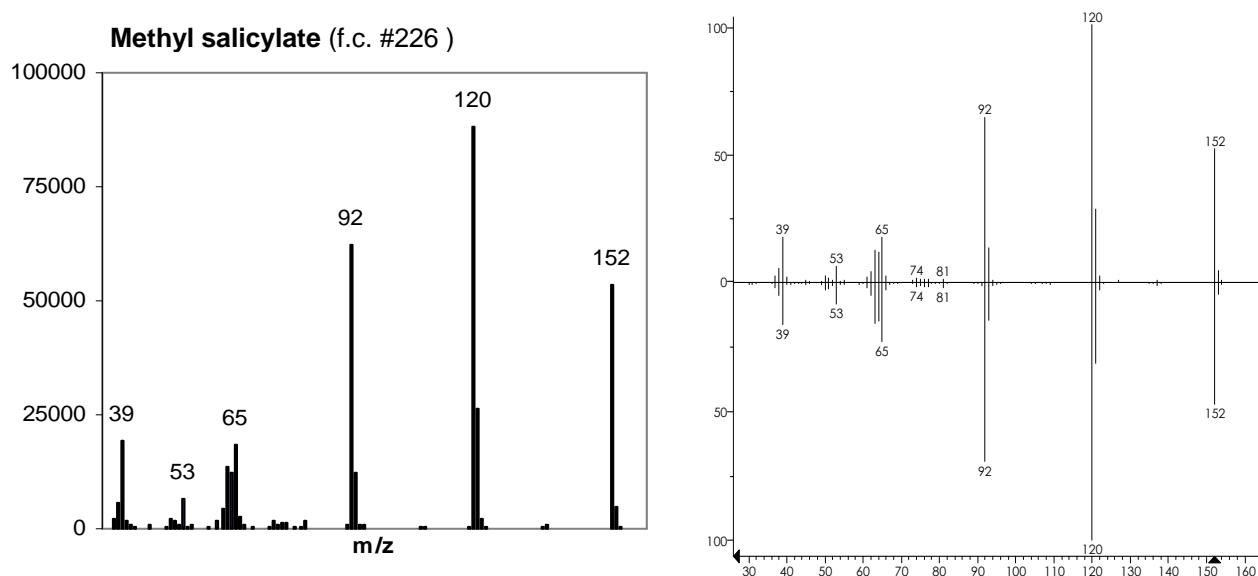

\* Number of a fragment cluster in the MMSR results

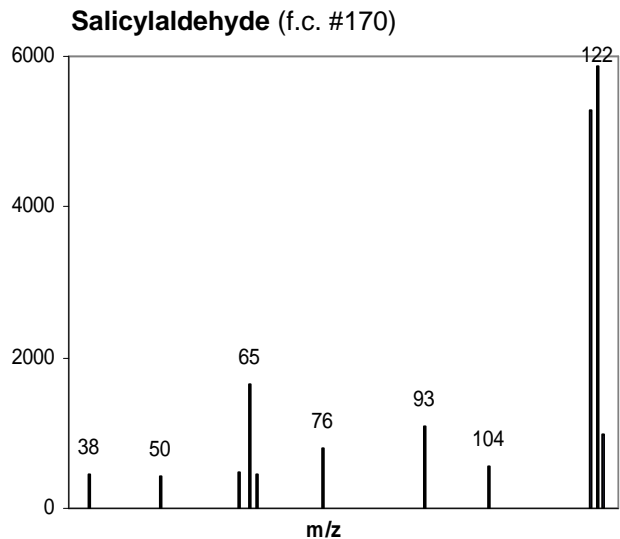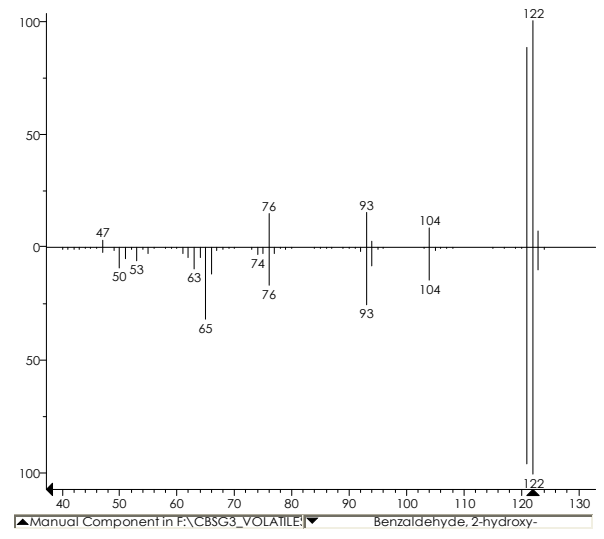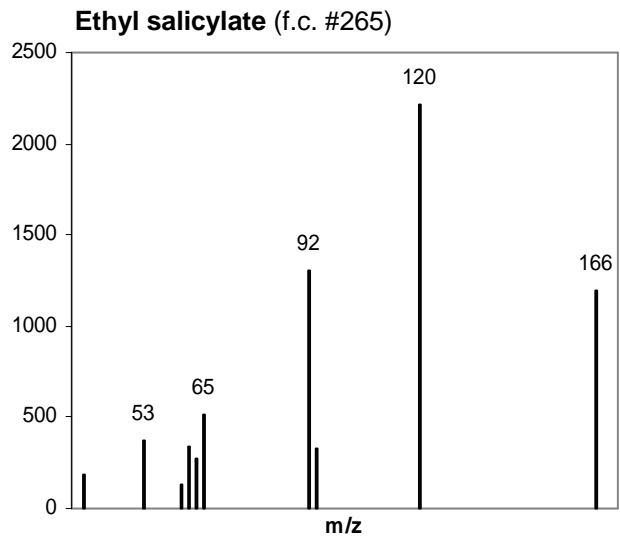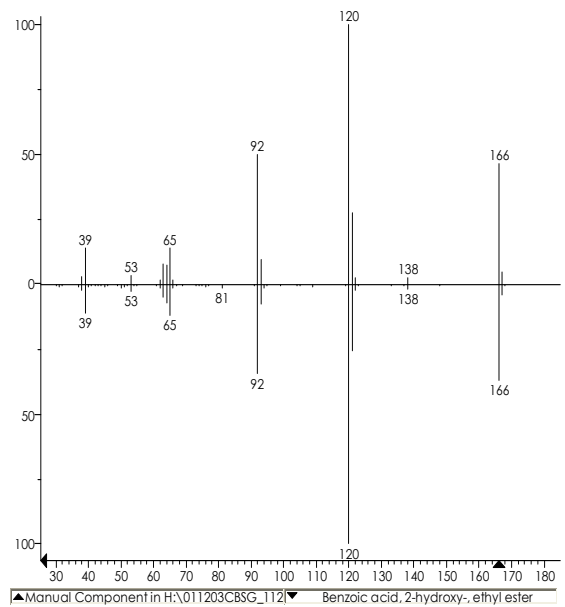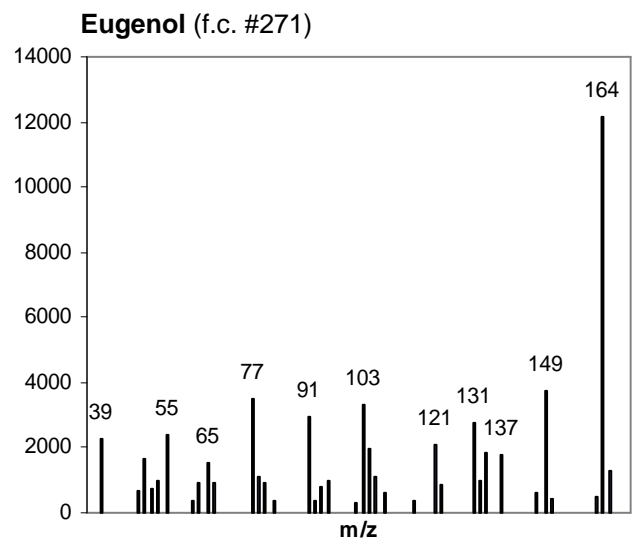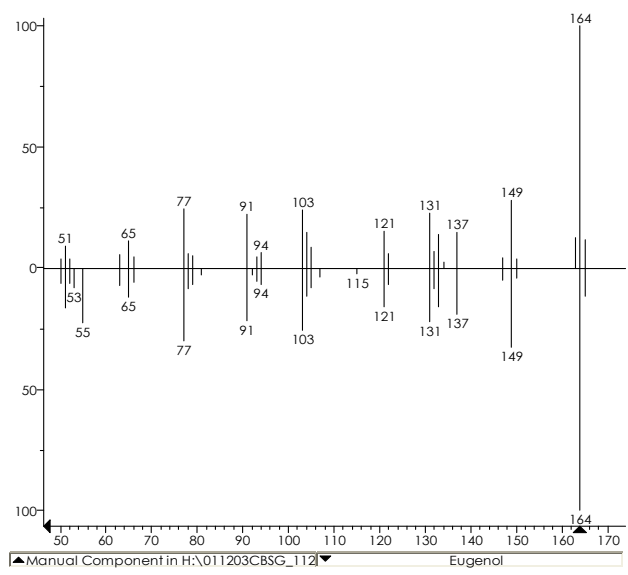

**Phenylacetaldehyde (f.c. #152)**

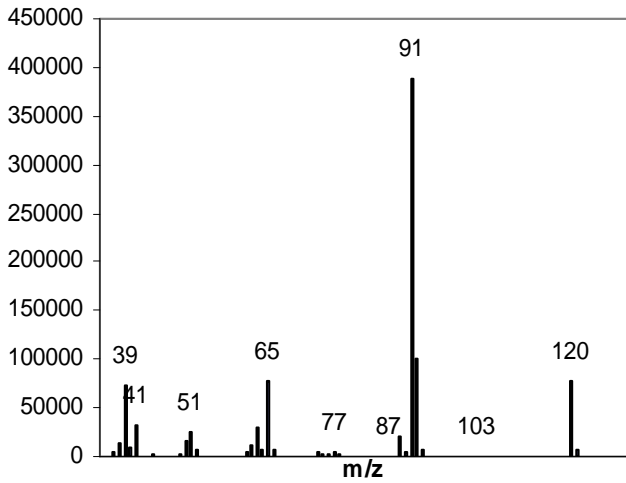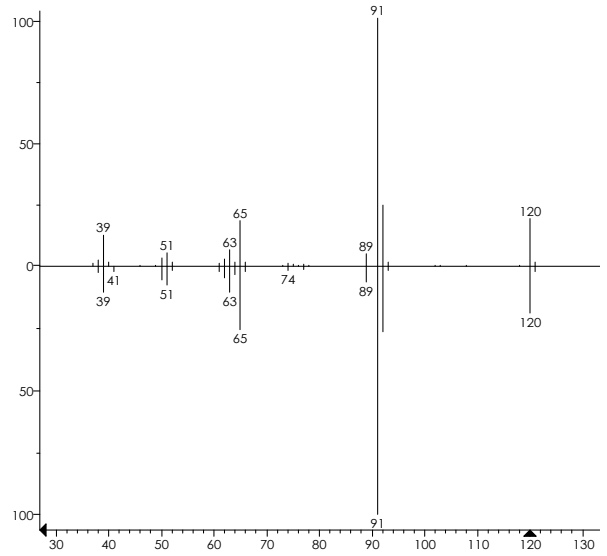

**Phenylethanol (f.c. #199)**

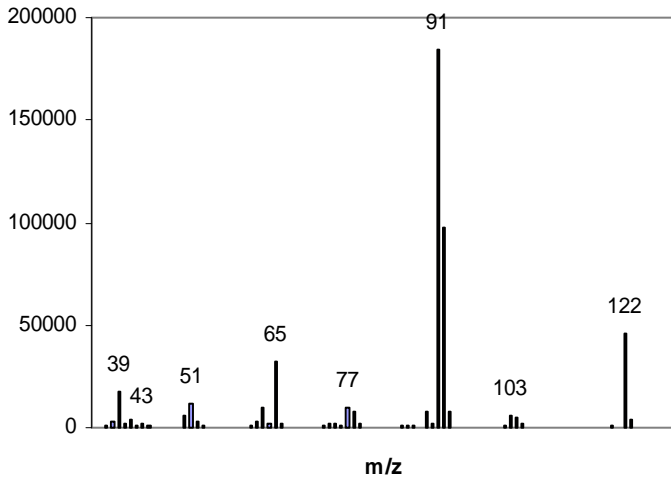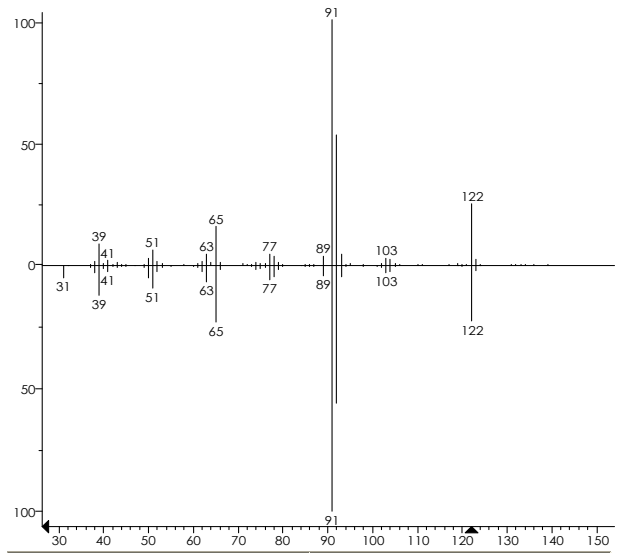

**Toluen (f.c. #34)**

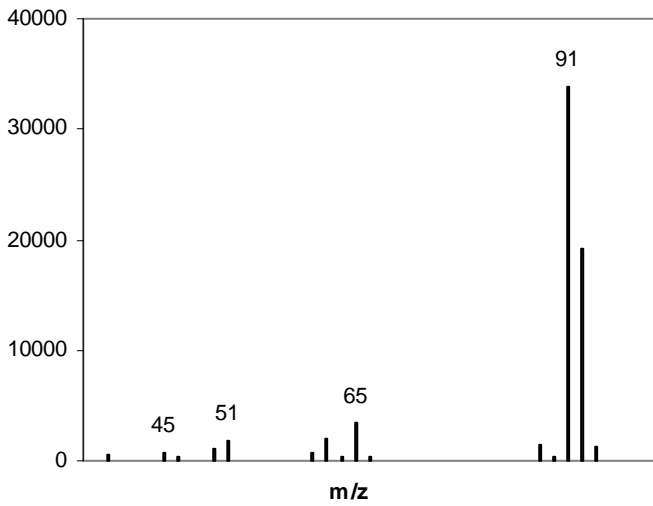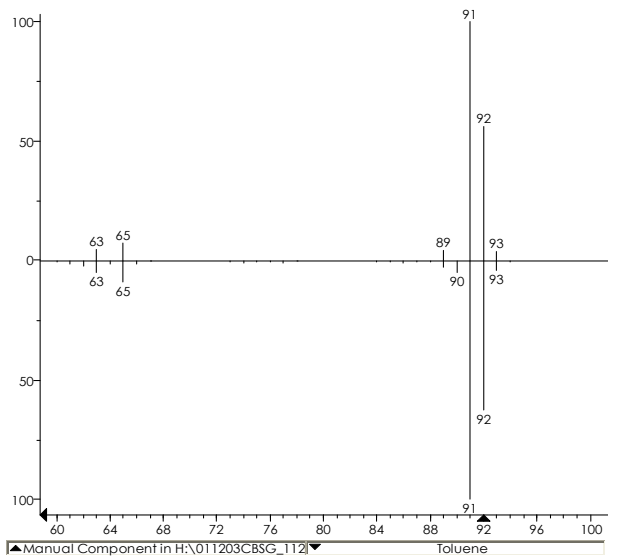

Manual Component in H:\011203CBSG\_112

Toluene

**Ethyl benzen (f.c. #67)**

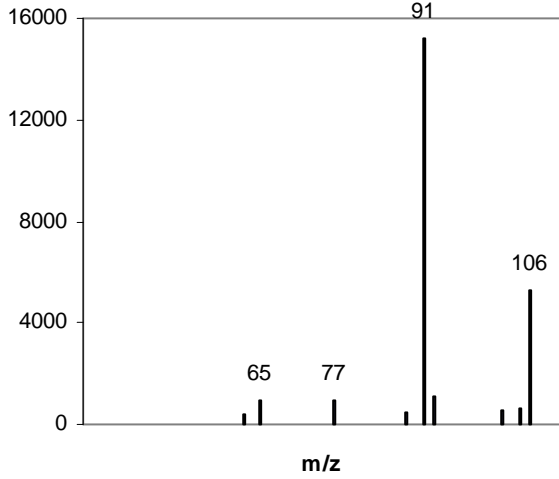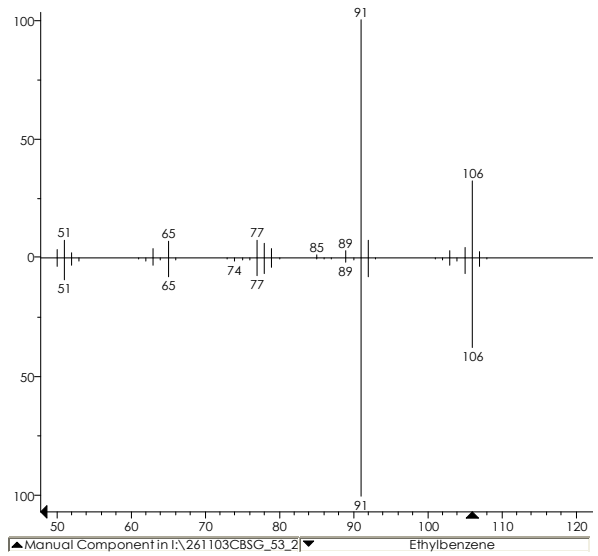

**Styren (f.c. #66)**

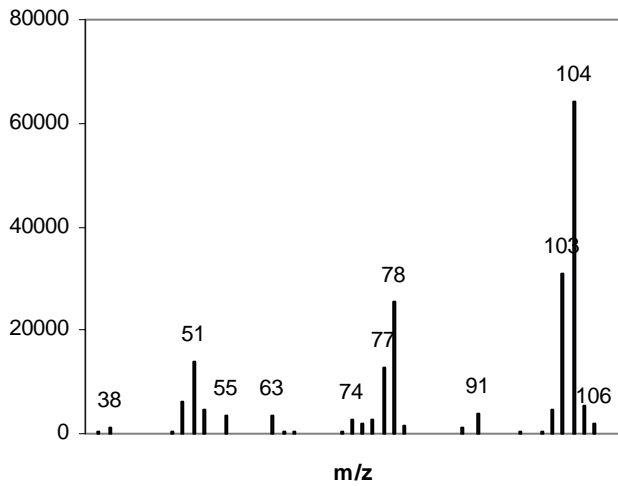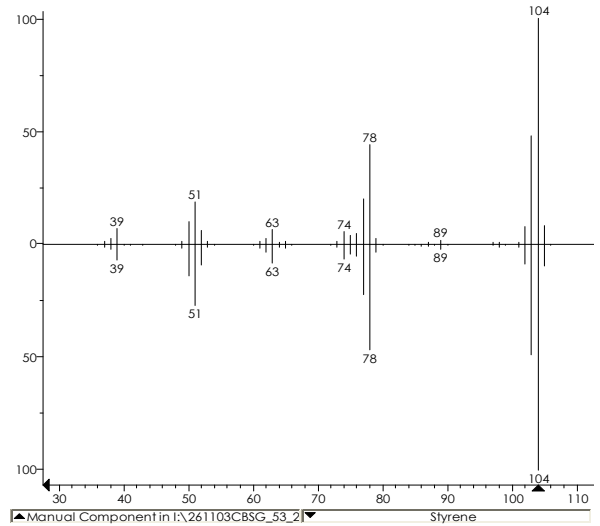

**1-Phenylpropane (f.c. #102)**

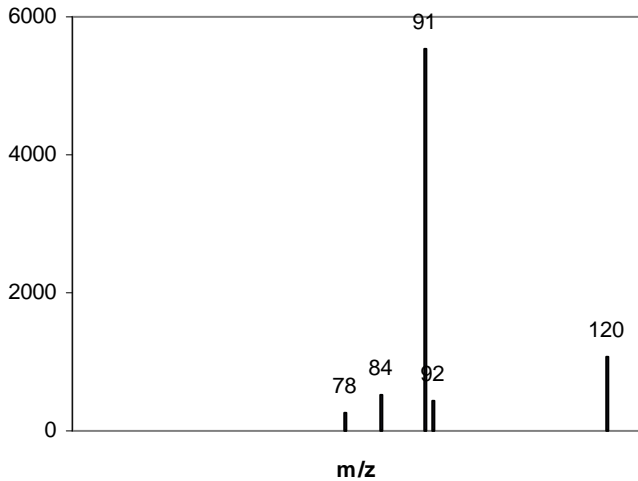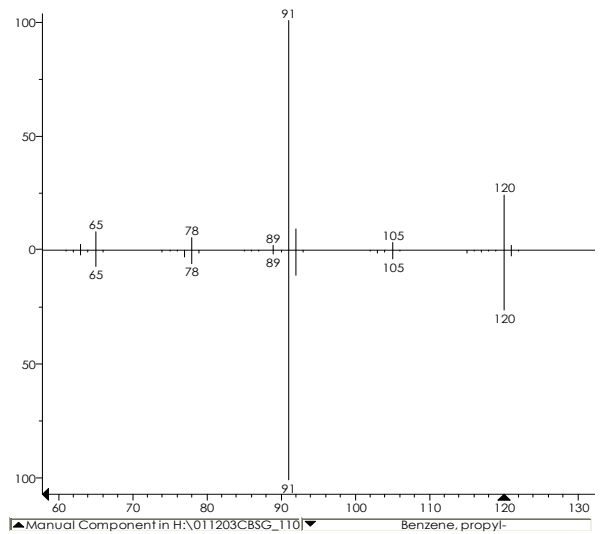

**Benzaldehyde (f.c. #103)**

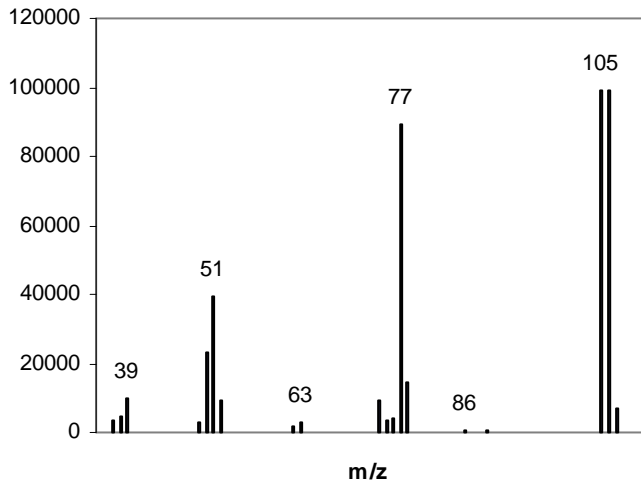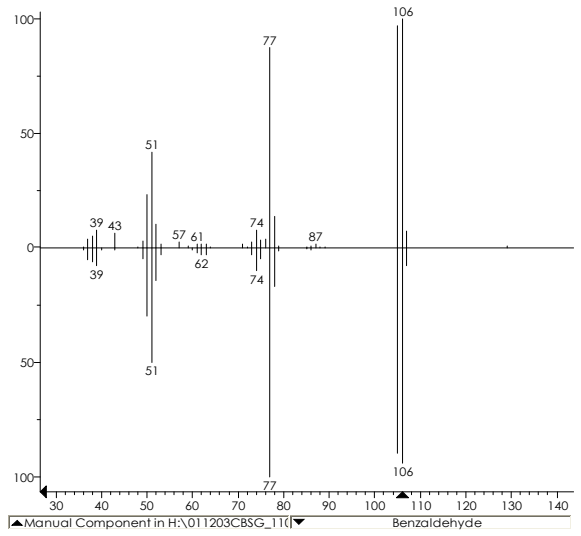

**Phenol (f.c. #106)**

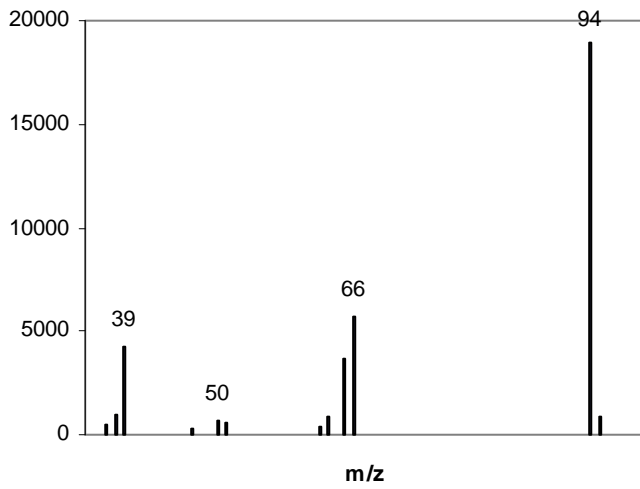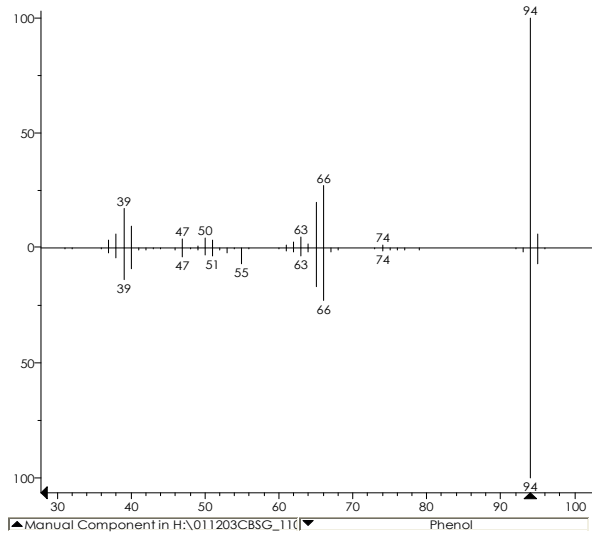

**o-Methylstyrene (f.c. #105)**

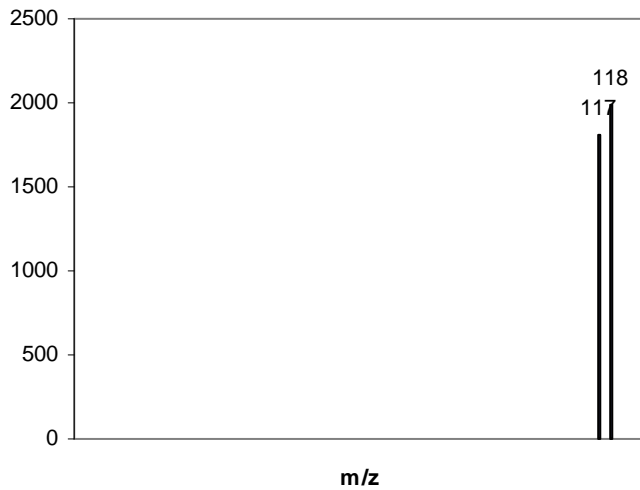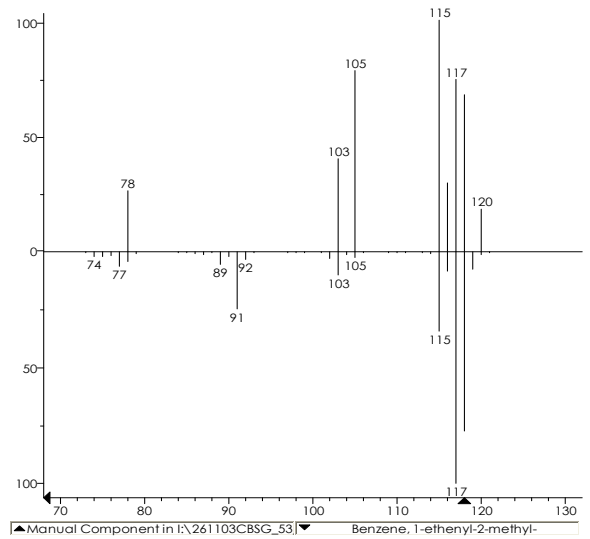

**Benzonitrile (f. c. #104)**

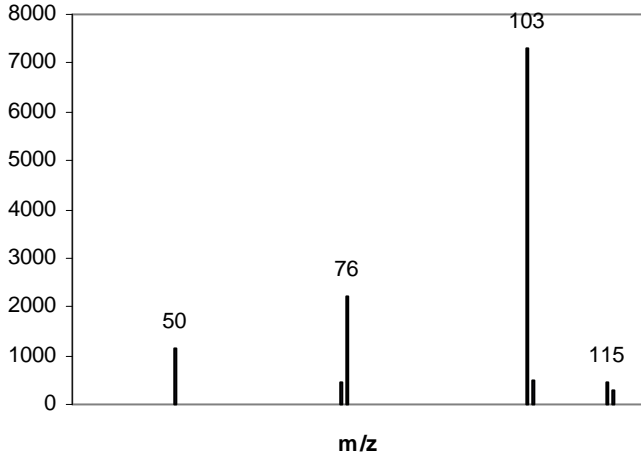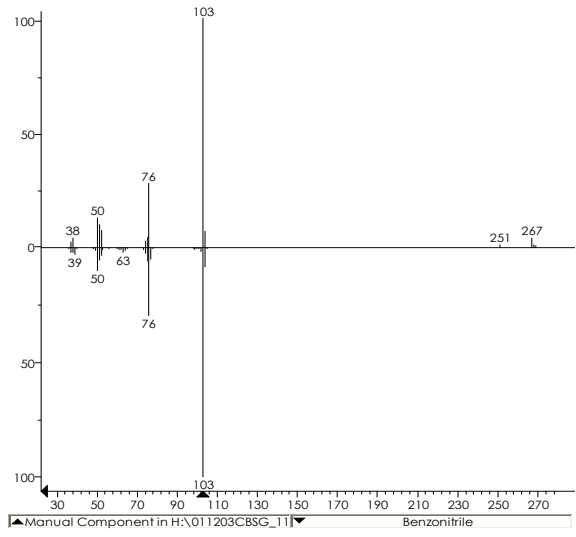

**2-Phenyl-3-buten-1-ol (f.c. #156)**

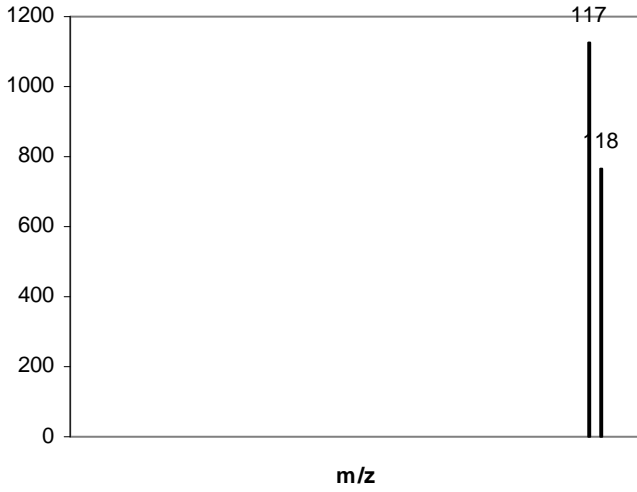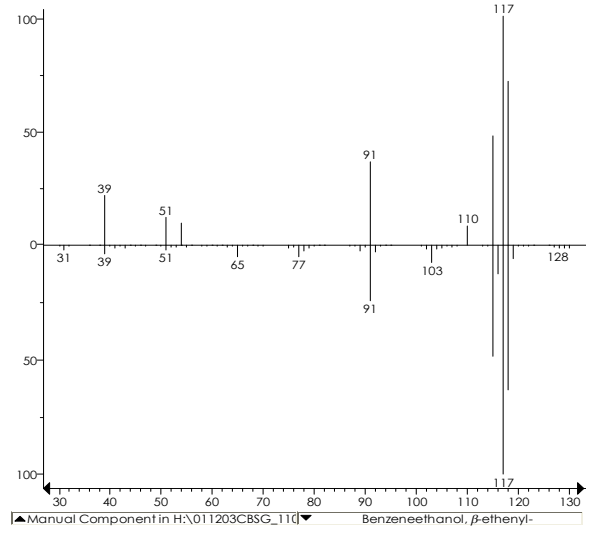

**Benzyl alcohol (f.c. #125)**

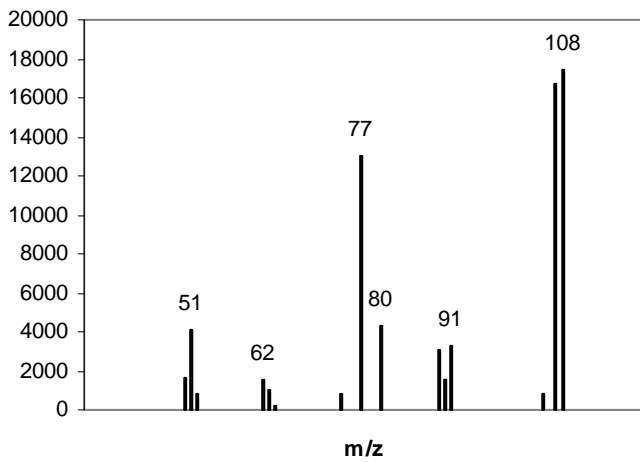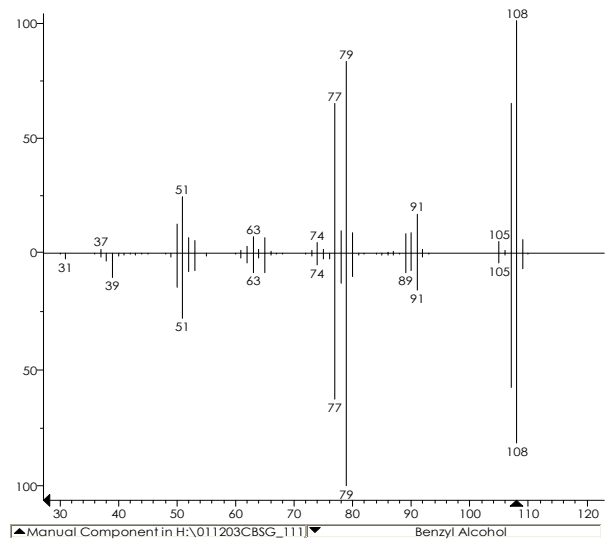

**p-Cresol (f.c. #166)**

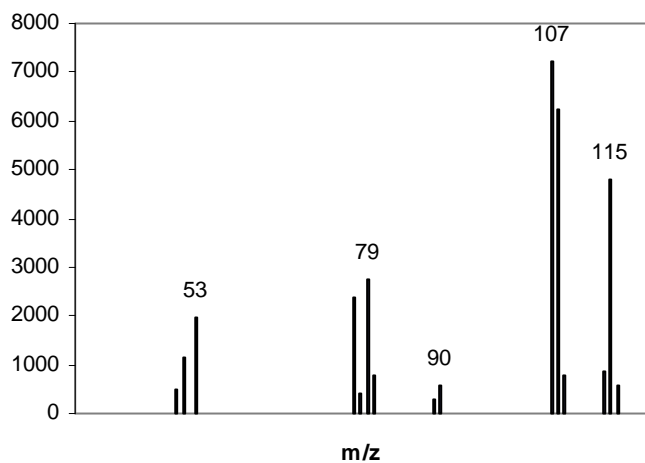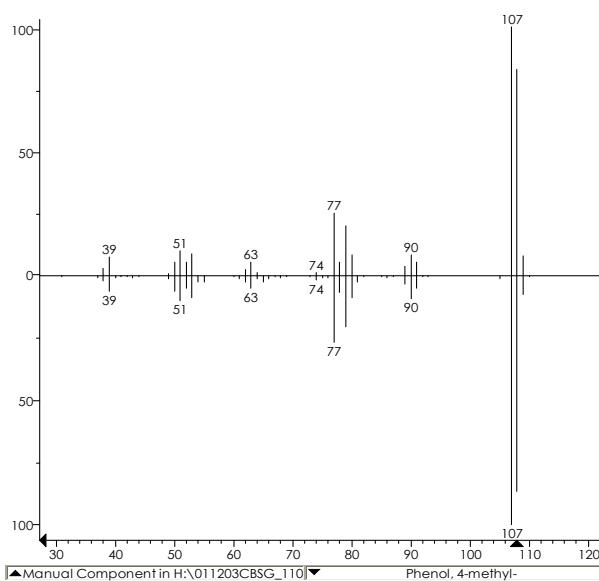

**$\alpha$ -Phenylpropionaldehyde (f.c. #204)**

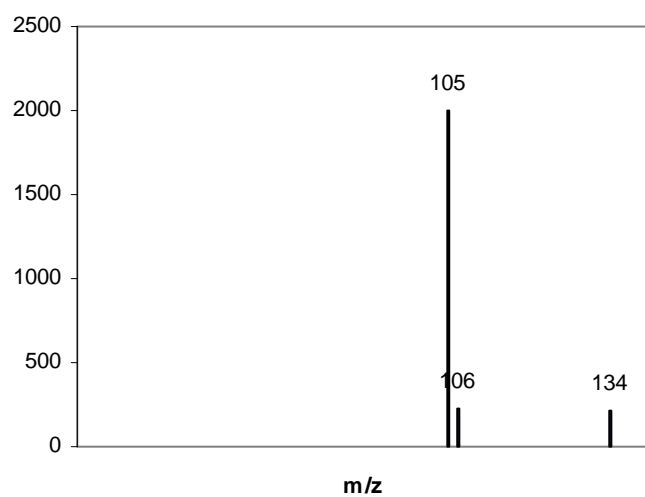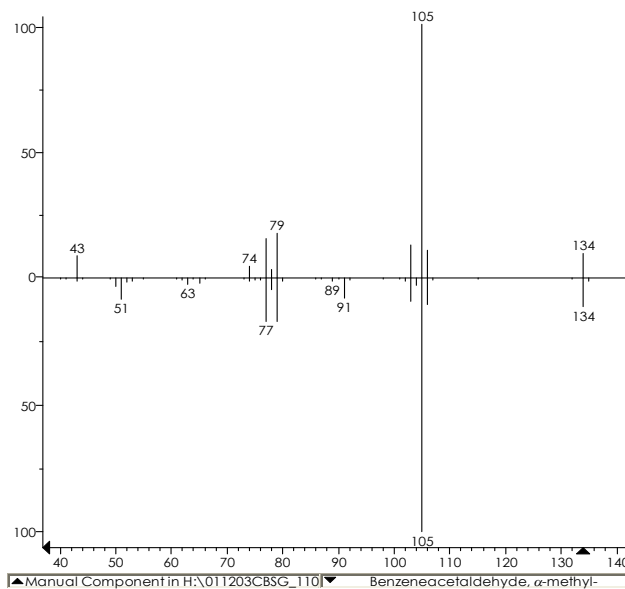

**Phenylacetonitrile (f.c. #202)**

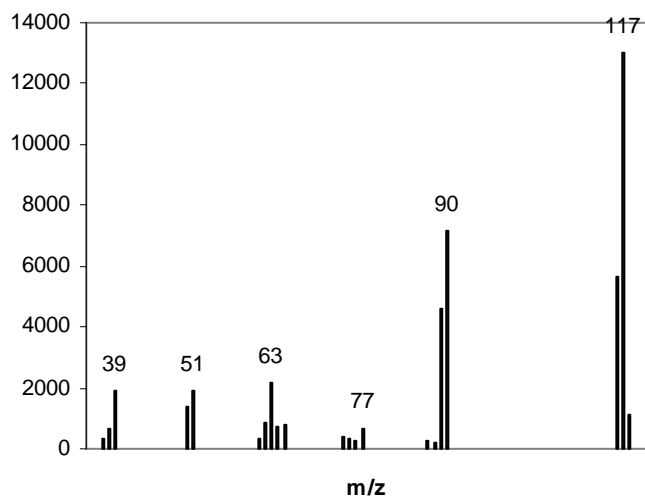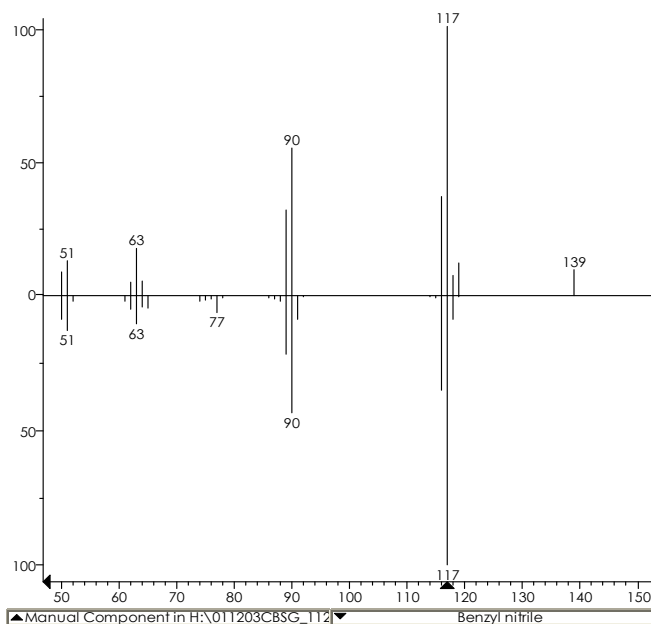

**$\beta$ -Phenylpropionaldehyde (f.c. #233)**

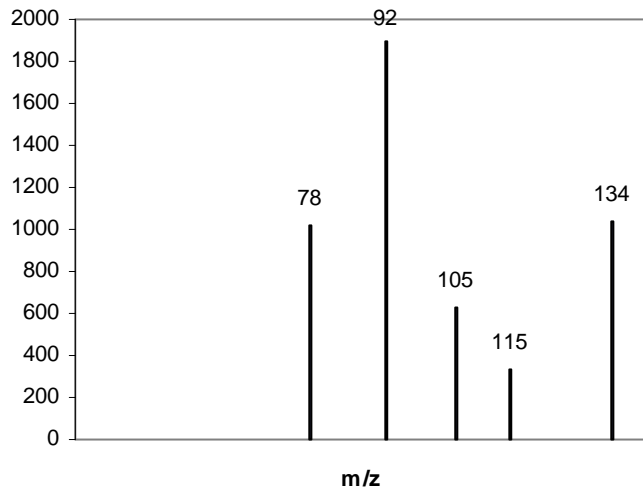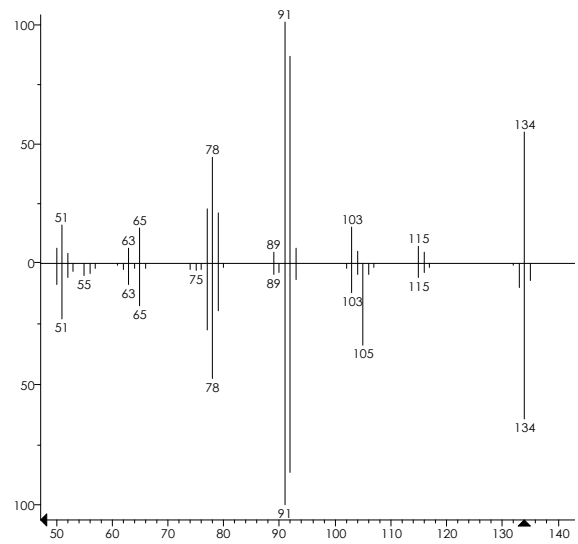

**Leucine and Isoleucine derived volatiles**

**3-Methylbutanal (f.c. #22)**

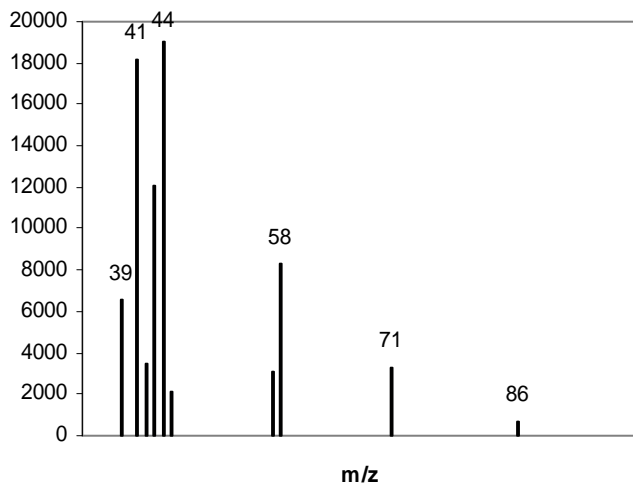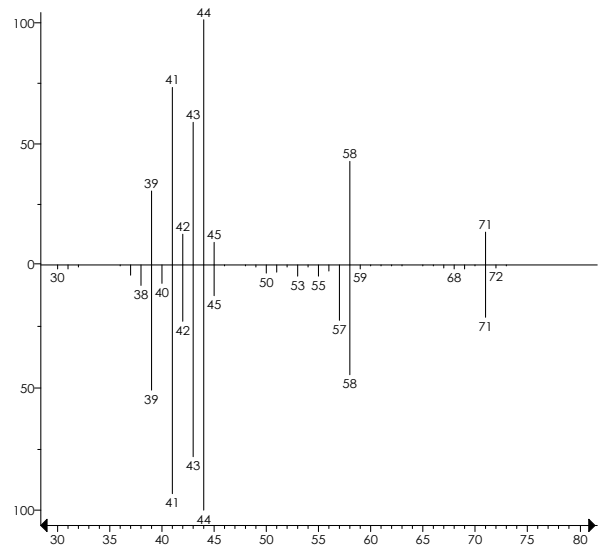

**2-Methylbutanal (f.c. #19)**

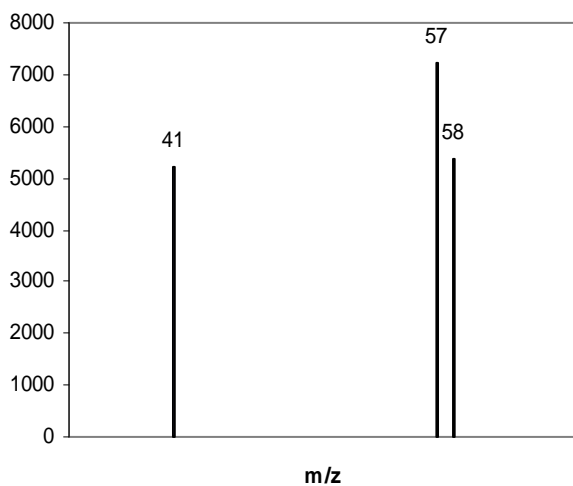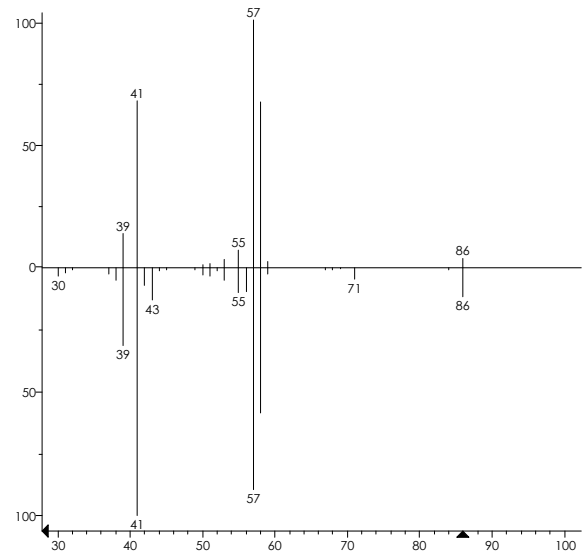



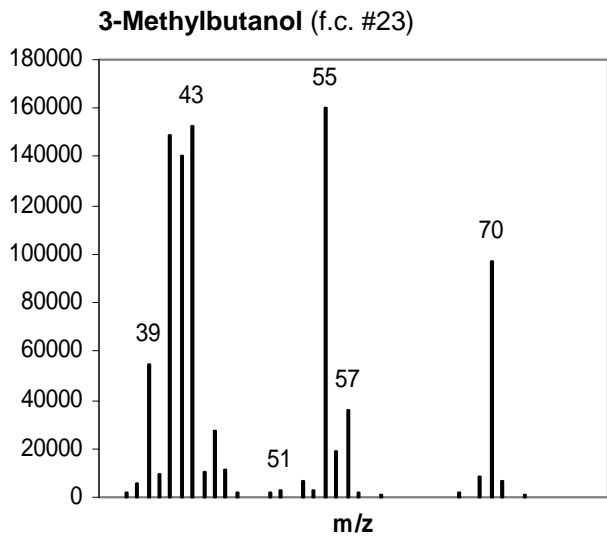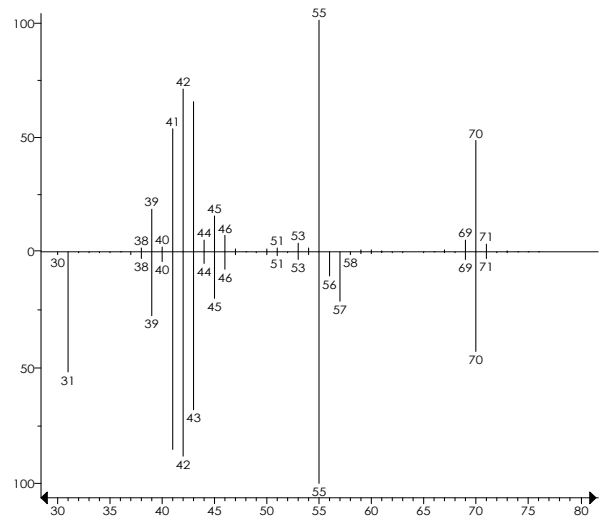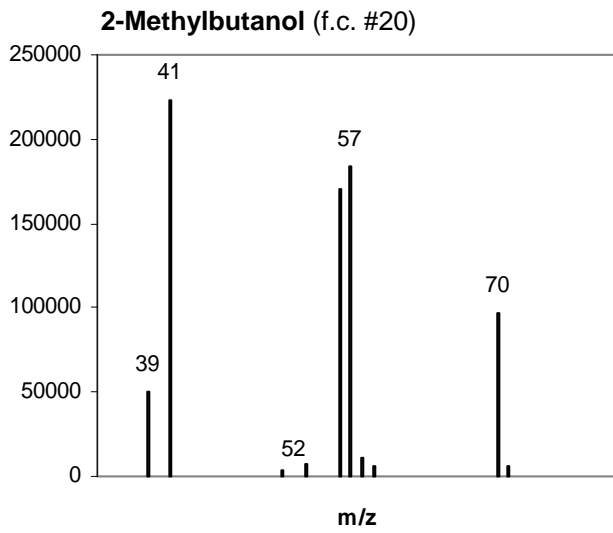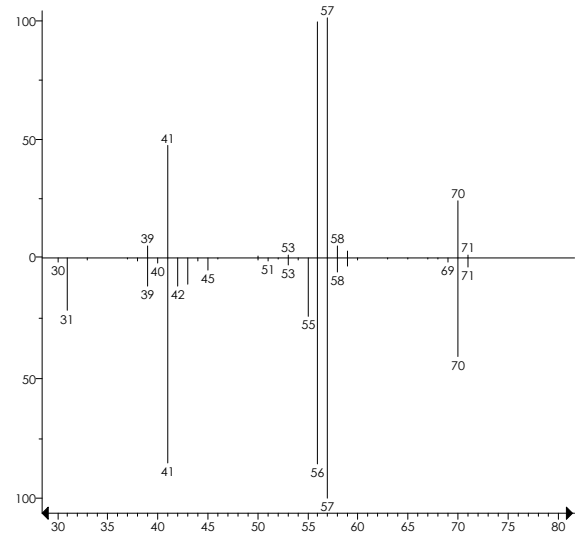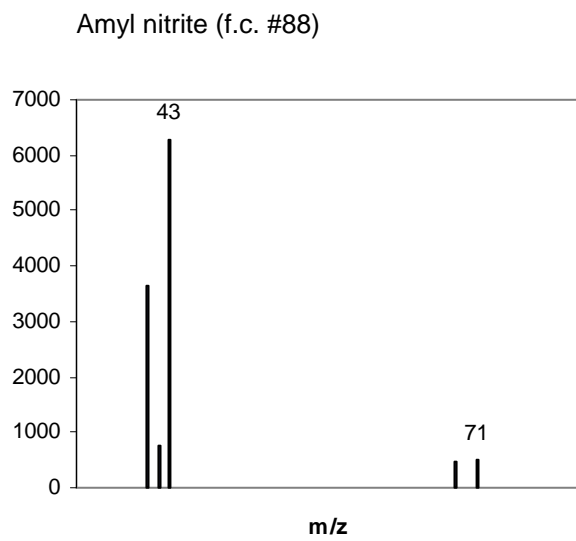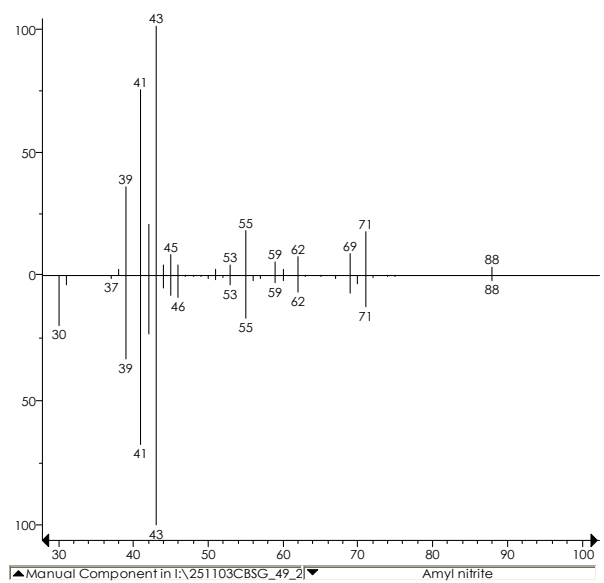

**2-Butenal, 2-methyl-, (E)- (f.c. #45)**

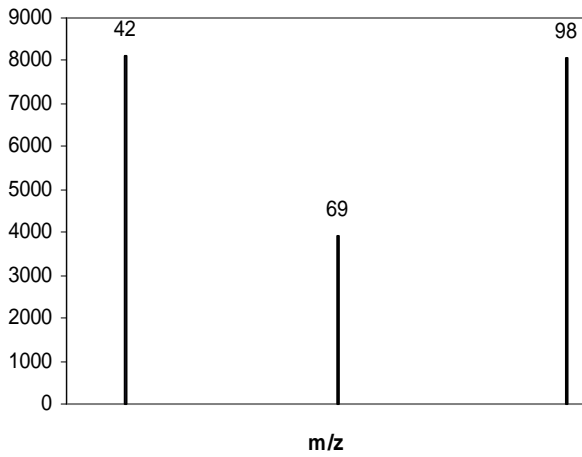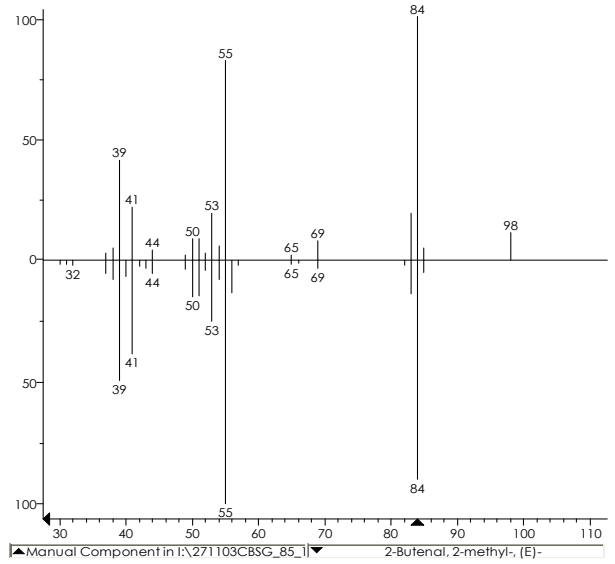

**3-Methylbutanol nitrite (f.c. #80)**

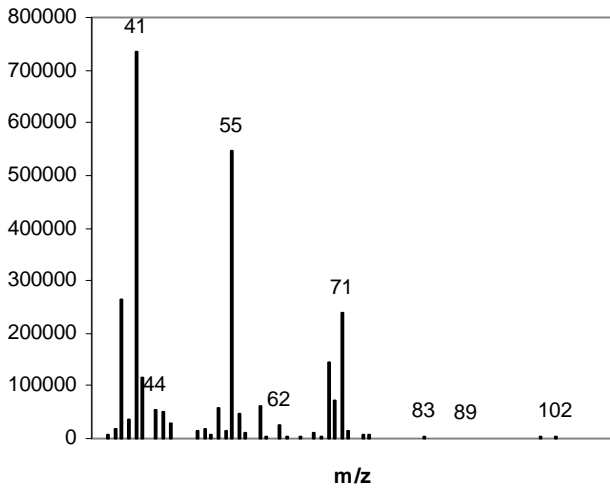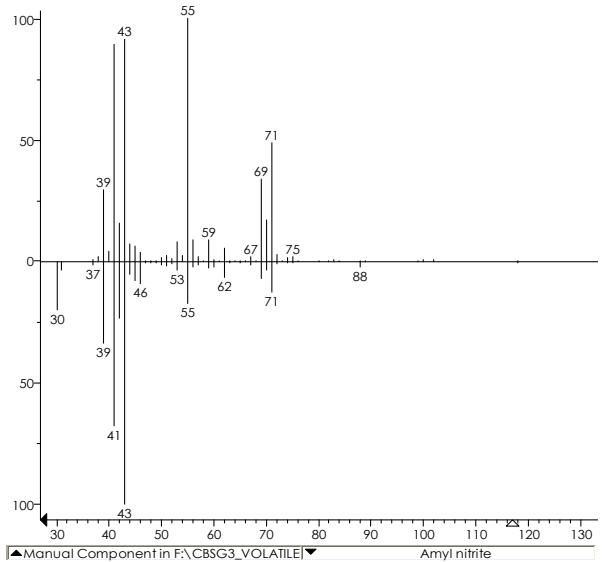

**Butanoic acid, 3-methyl- (f.c. #29)**

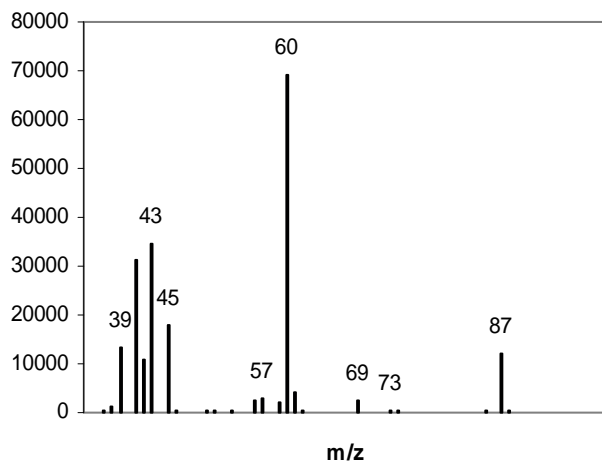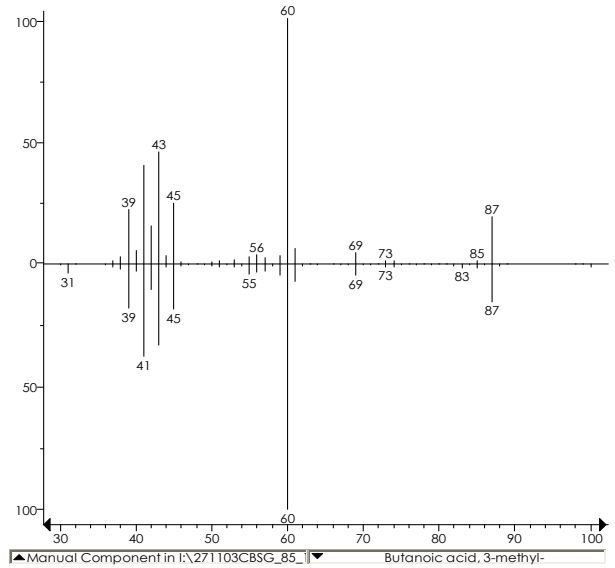

Nitrocyclopentane (f.c. #81)

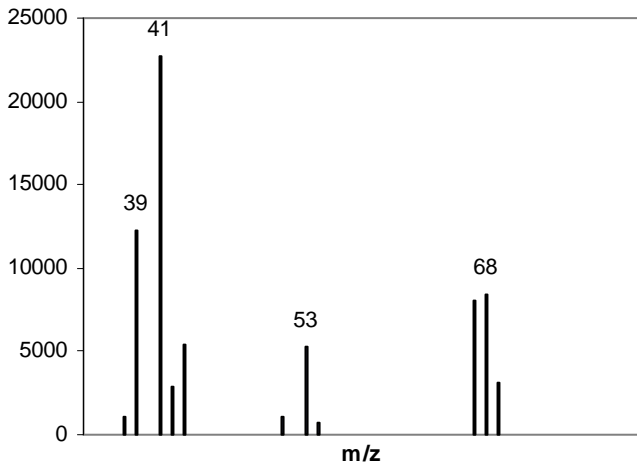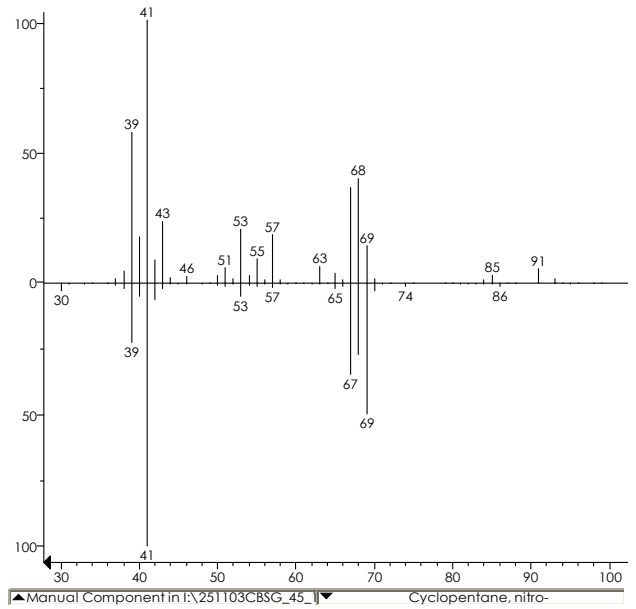

2-Isobutylthiazole (f.c. #162)

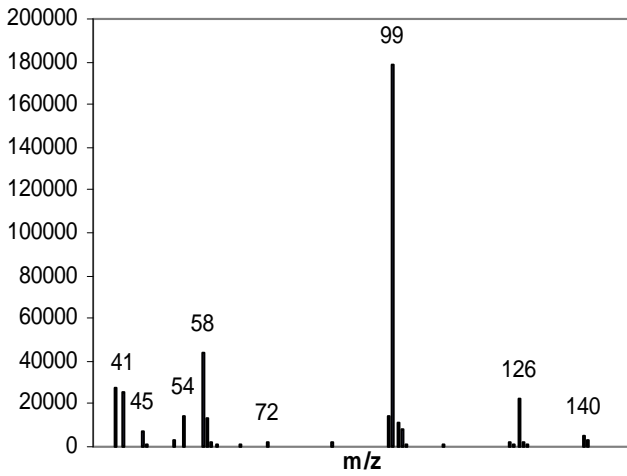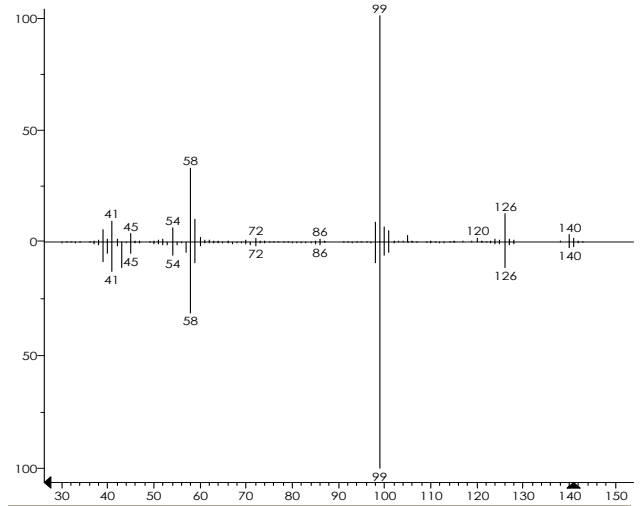

## Lipid derived volatiles

1-Penten-3-ol (f.c. #15)

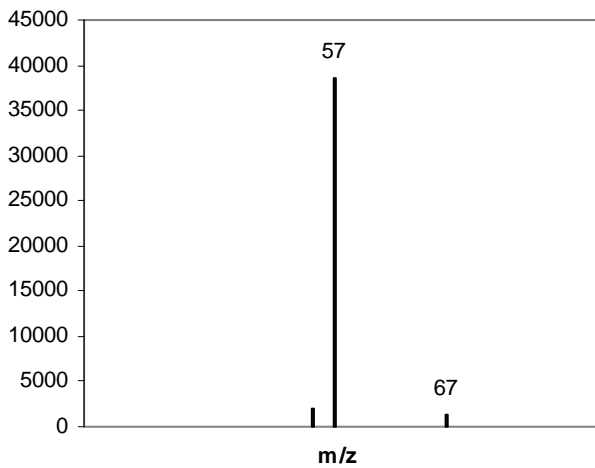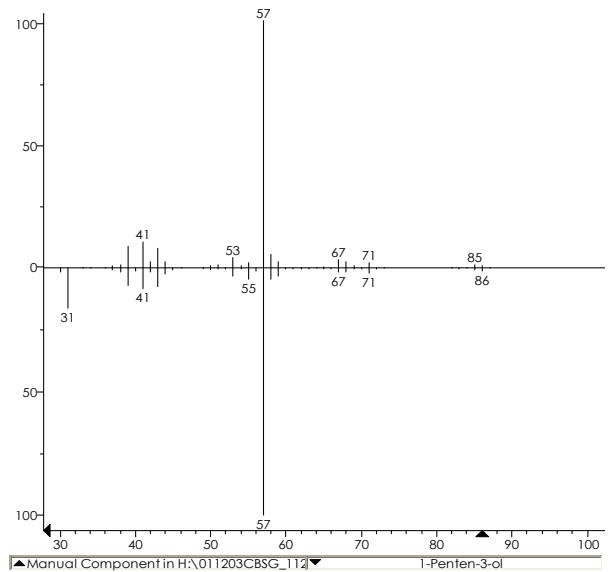

**Pentanal (f.c. #10)**

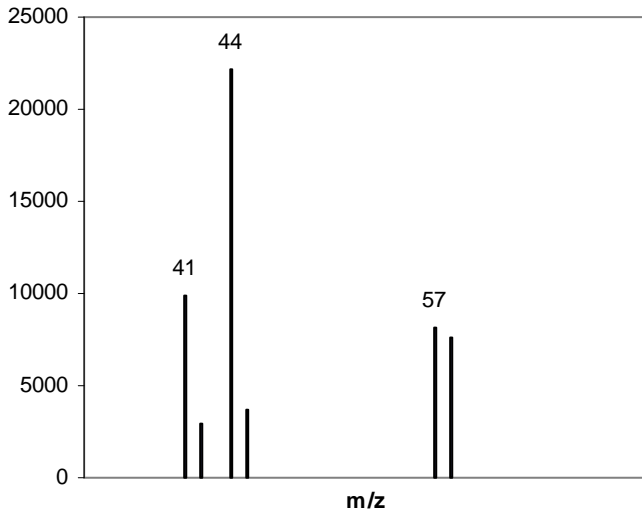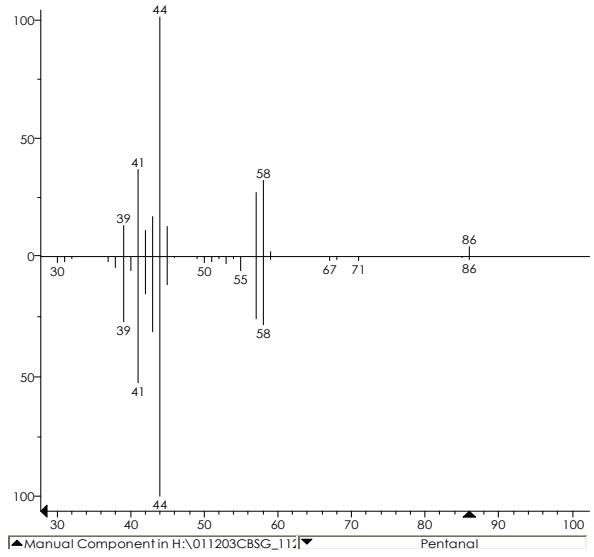

**1-Penten-3-one (f.c. #16)**

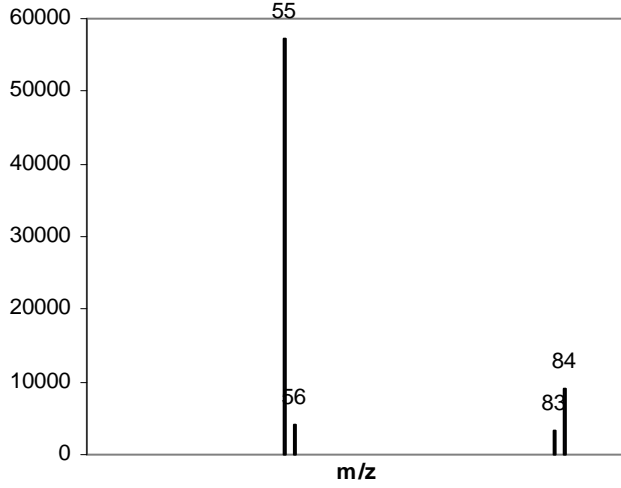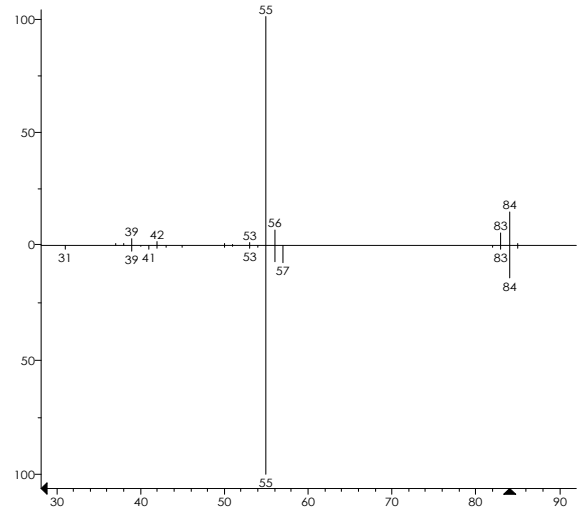

**Z-3-Hexenol (f.c. #49)**

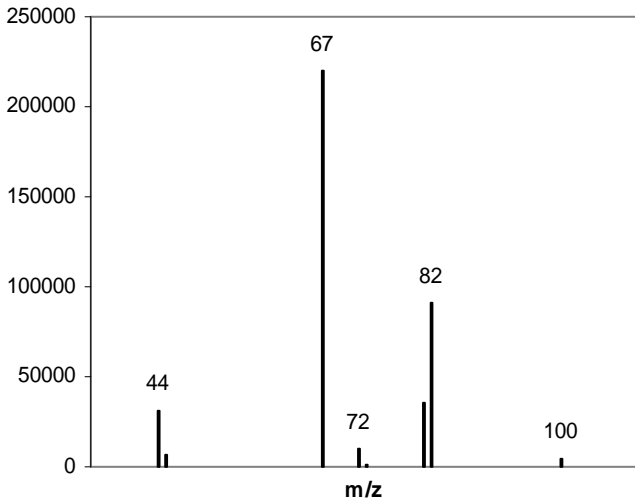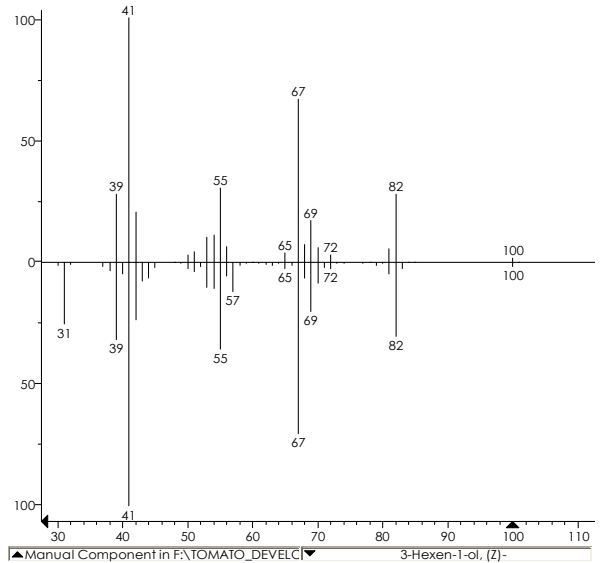

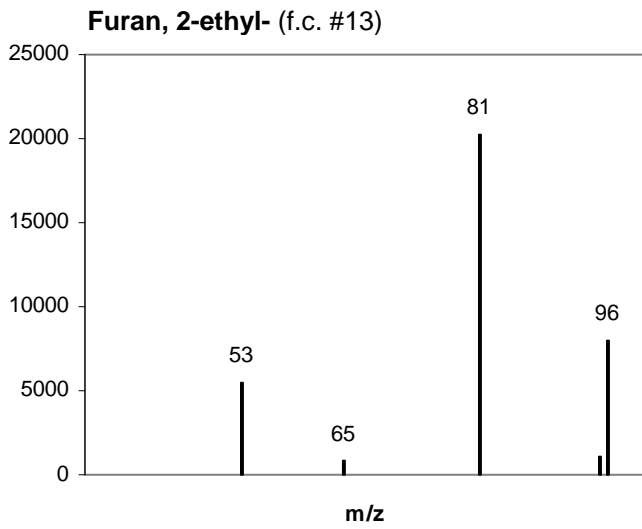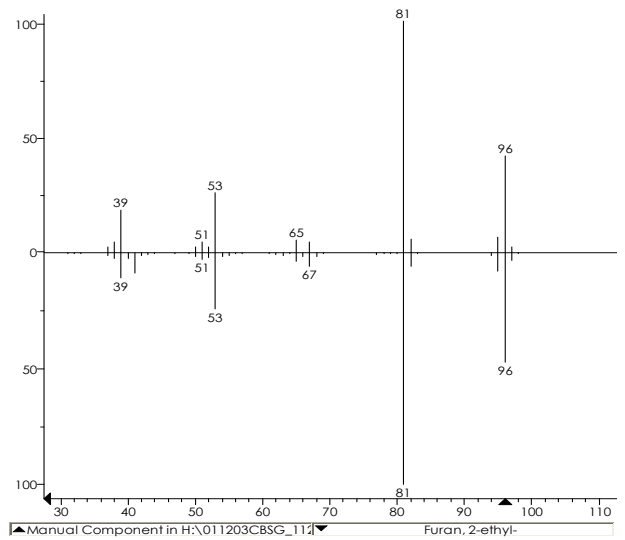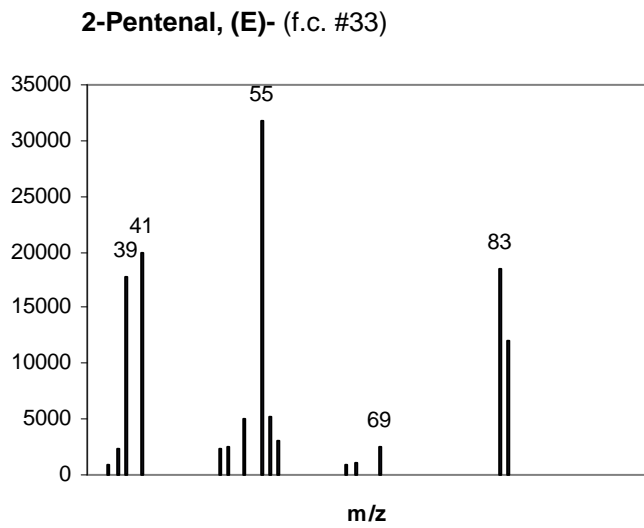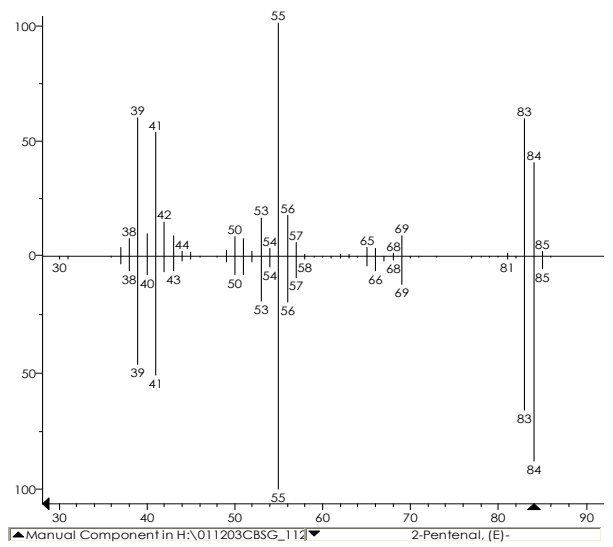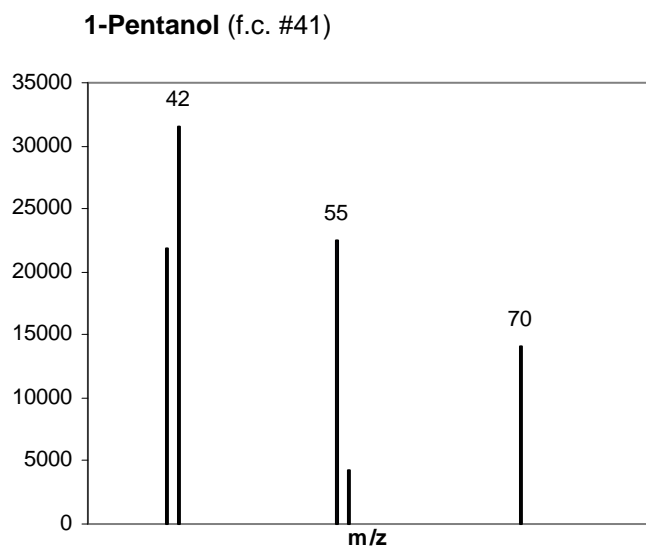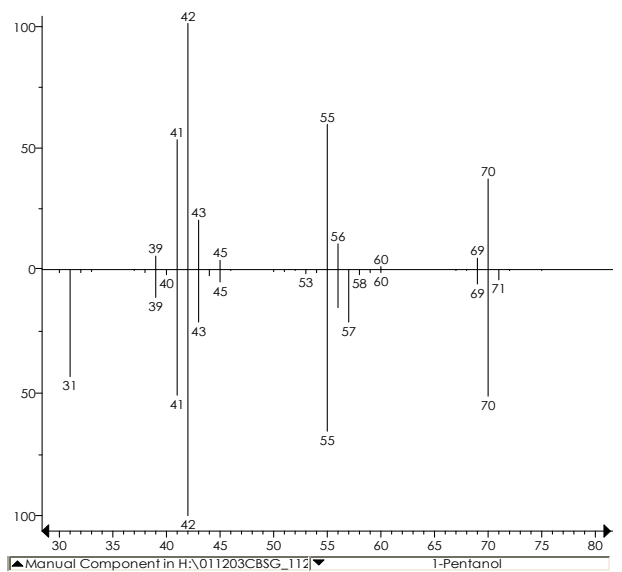

**Z-3-Hexenal (f.c. #37)**

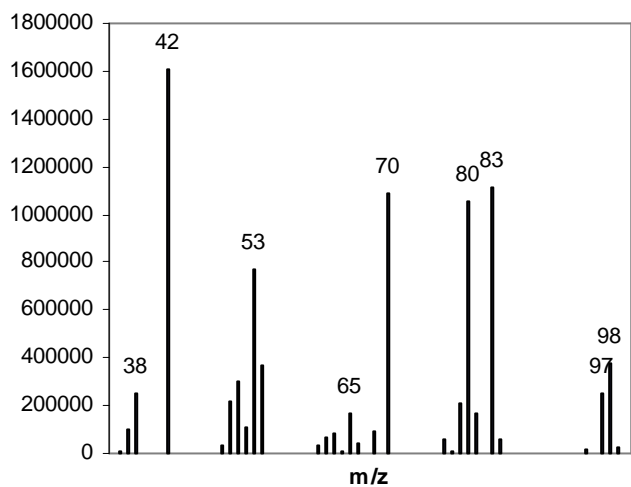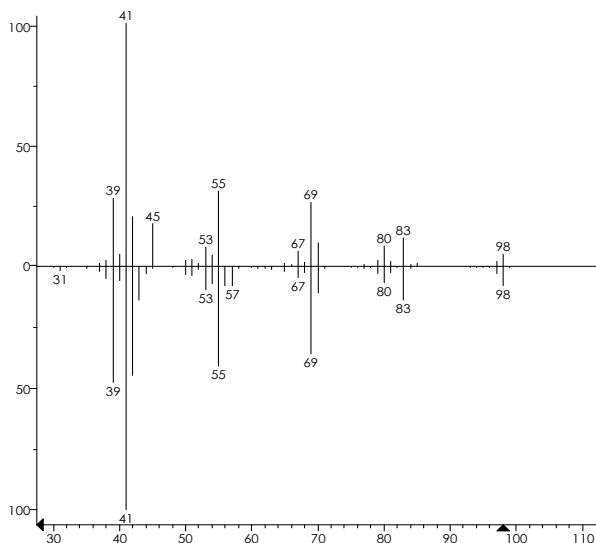

**Hexanal (f.c. #39)**

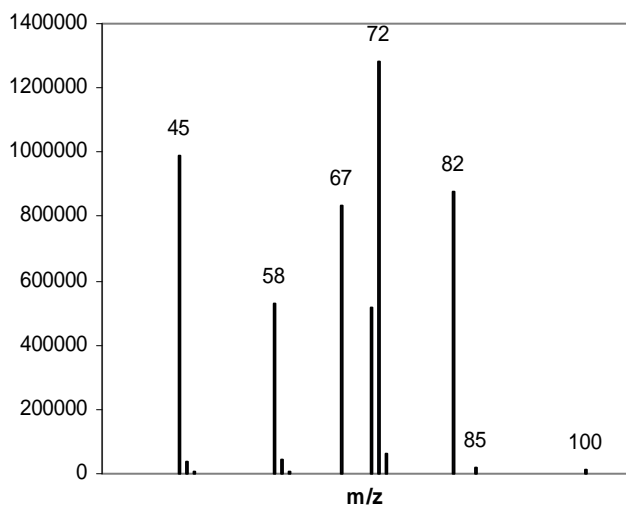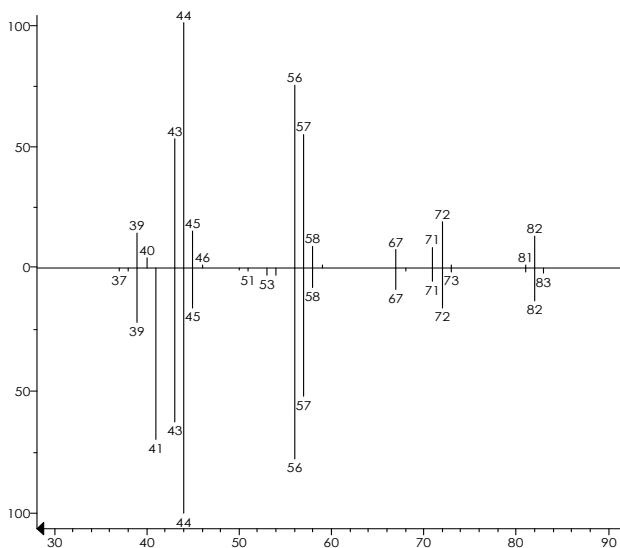

**E-2-Hexenal (f.c. #57)**

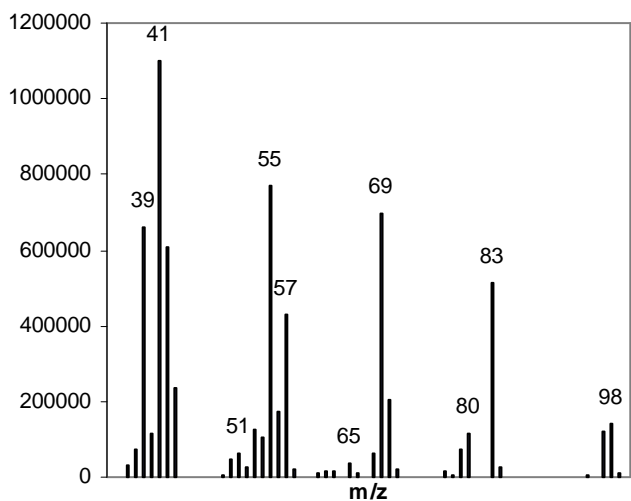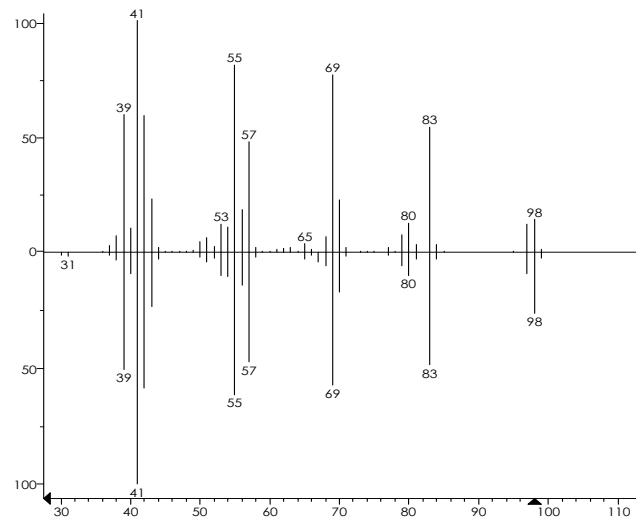

### 2-Hexenal (f.c. #55)

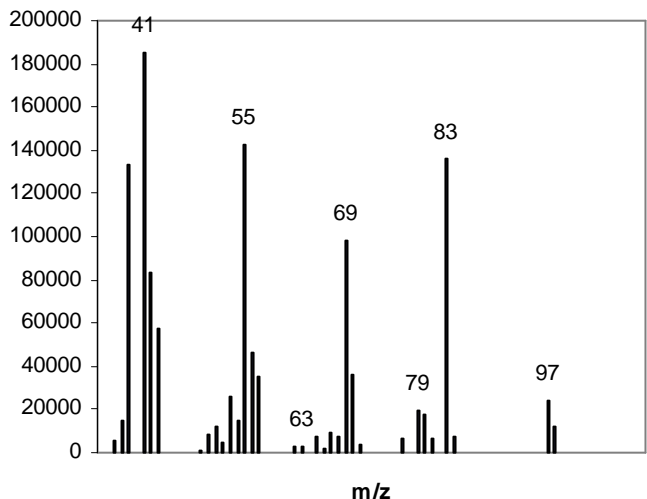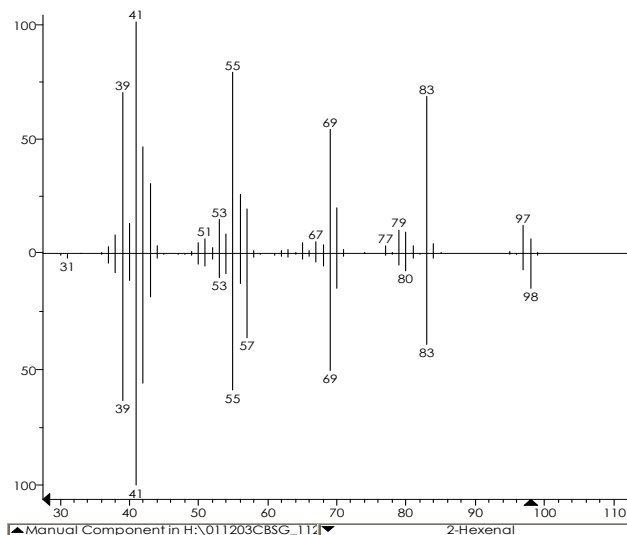

### Z-2-Penten-1-ol (f.c. #47)

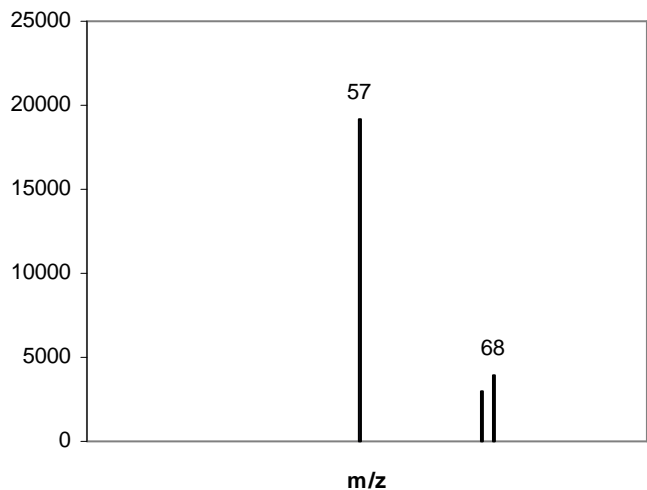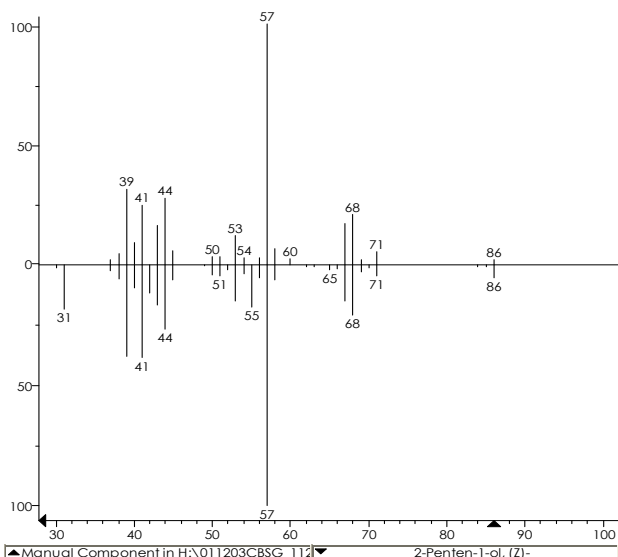

### 1-Hexanol (f.c. #71)

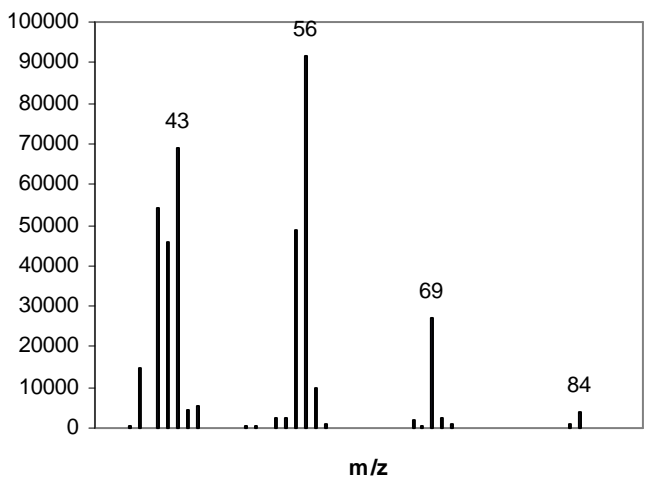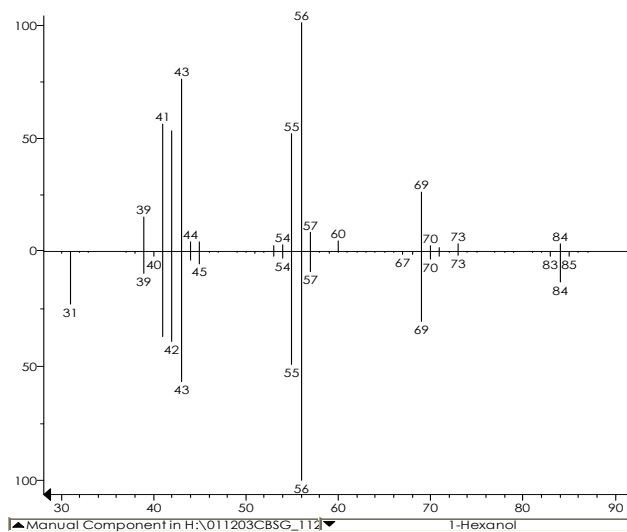

### Heptanal (f.c. #99)

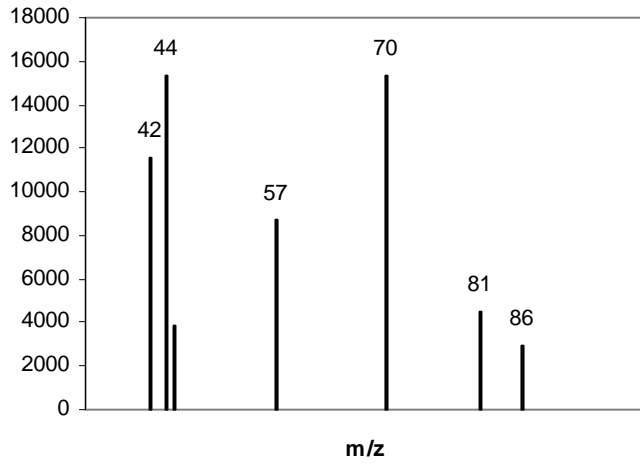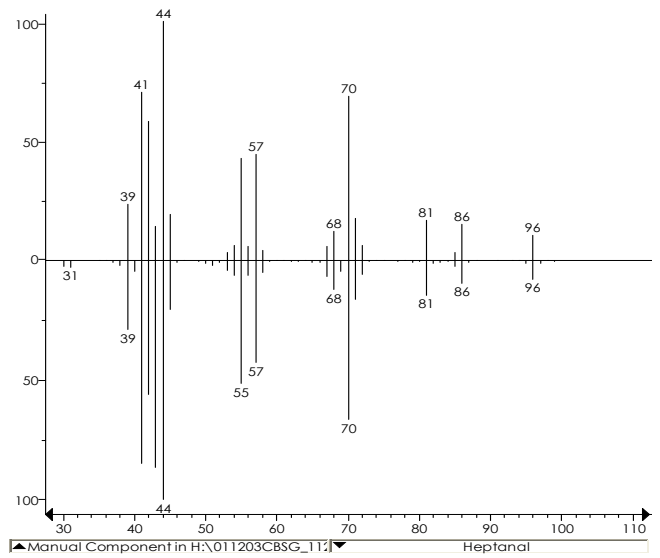

### E,E-2,4-Hexadienal (f.c. #94)

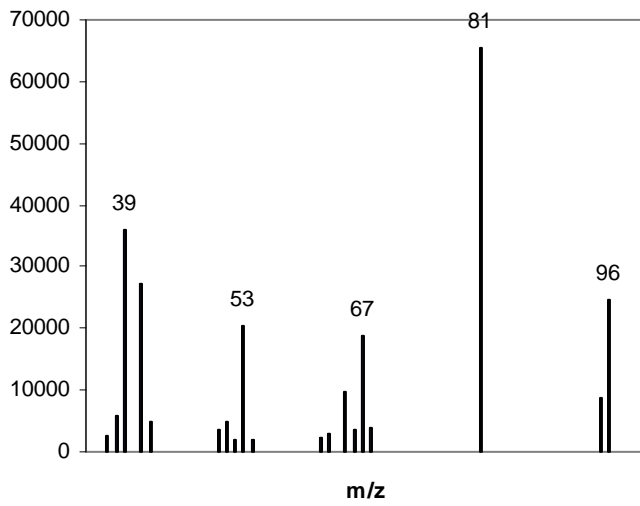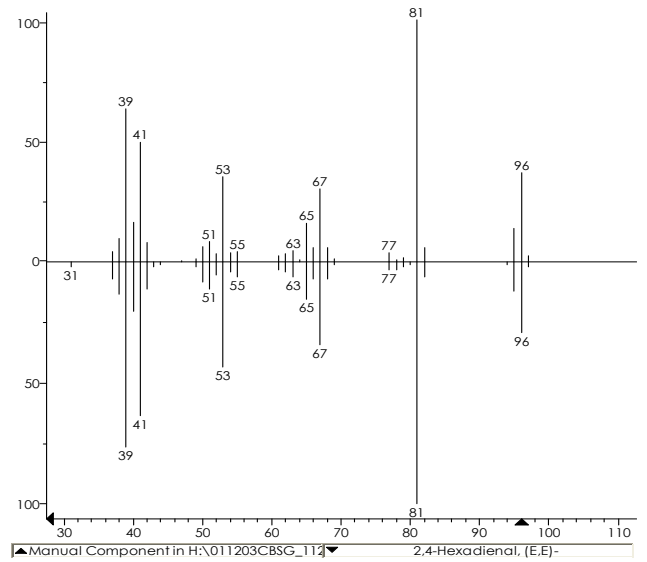

### 2-Pentylfuran (f.c. #112)

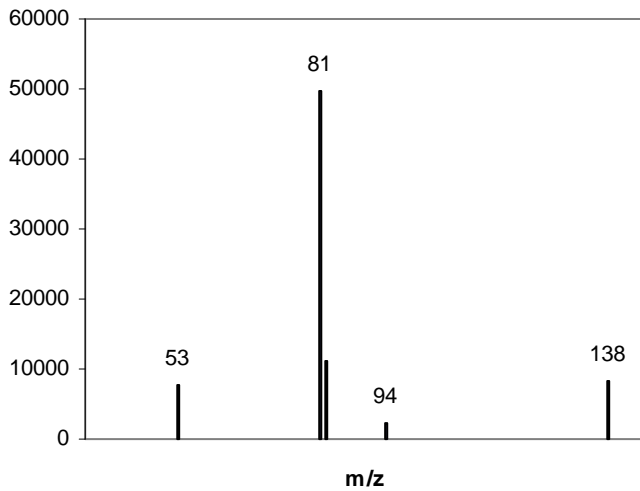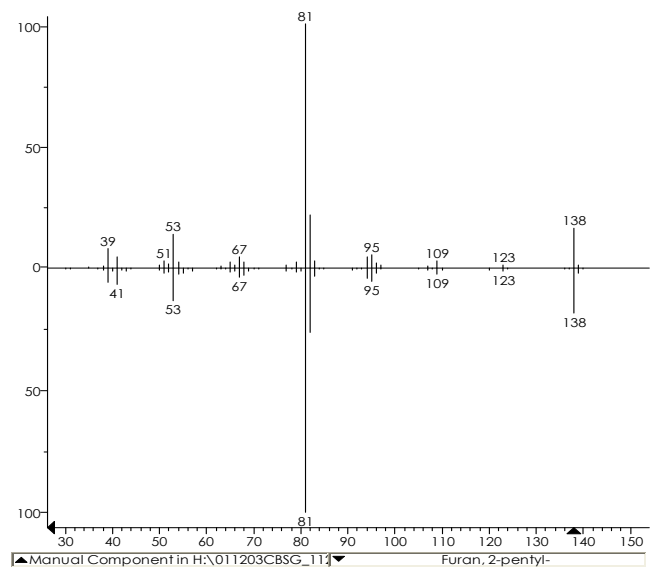



**E-2-Heptenal (f.c. #92)**

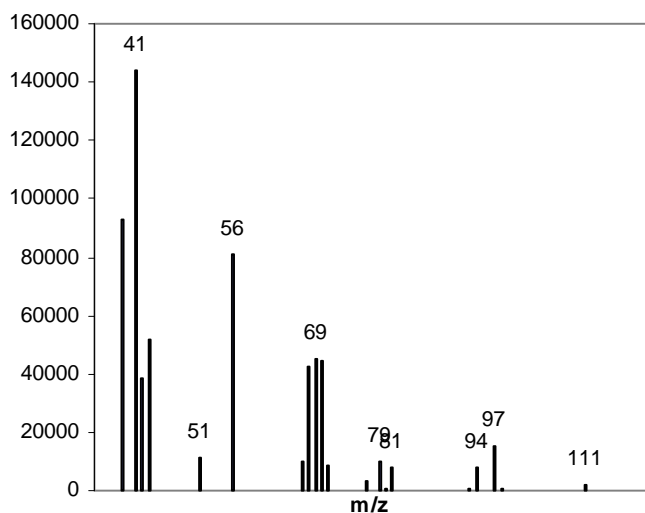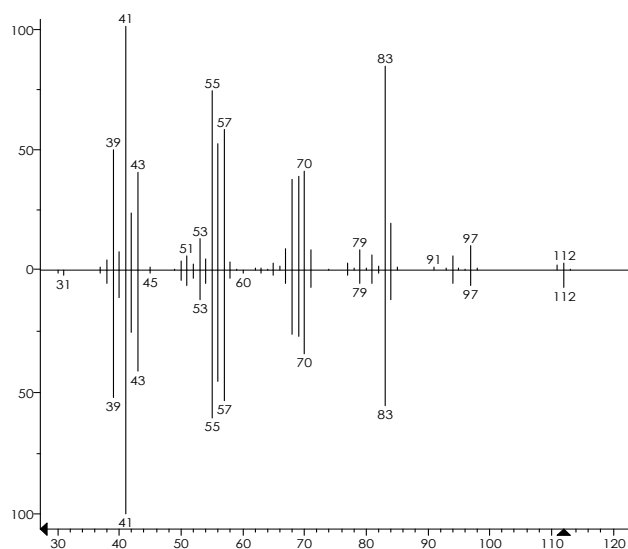

**2-Ethylhexanol (f.c. #150)**

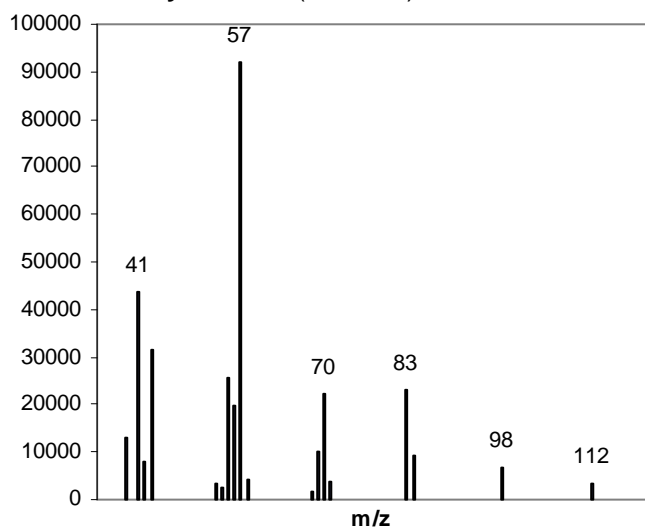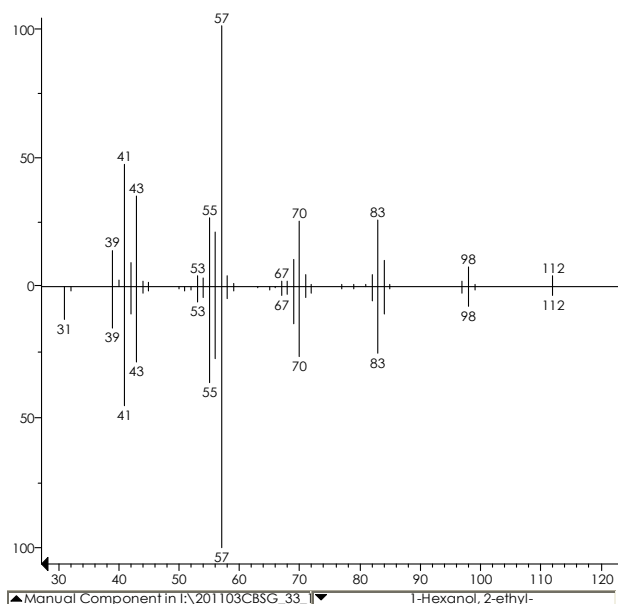

Manual Component in I:\201103CBSG\_33\_1 1-Hexanol, 2-ethyl-

**E,E-2,4-Heptadienal (f.c. #109)**

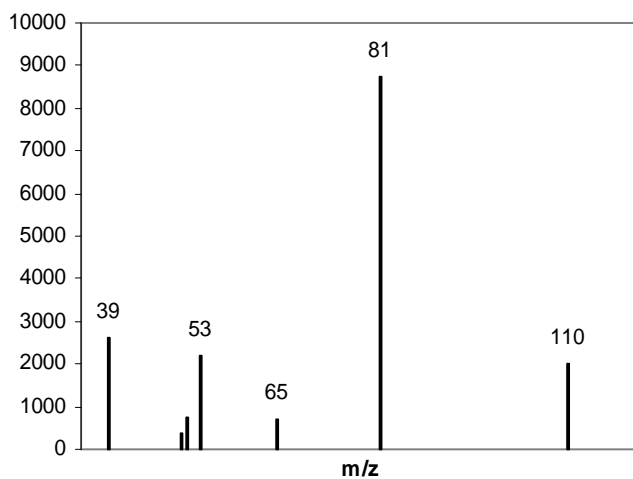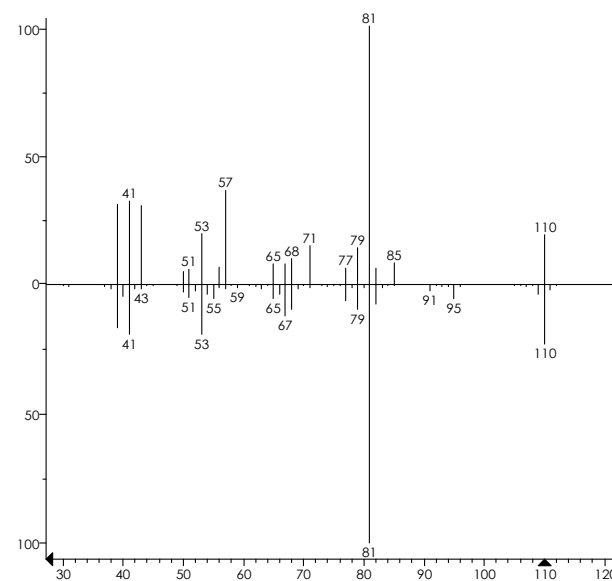

Manual Component in I:\201103CBSG\_33\_1 2,4-Heptadienal, (E,E)-

## Open chain carotenoid derivatives

**6-Methyl-5-hepten-2-one (f.c. #120)**

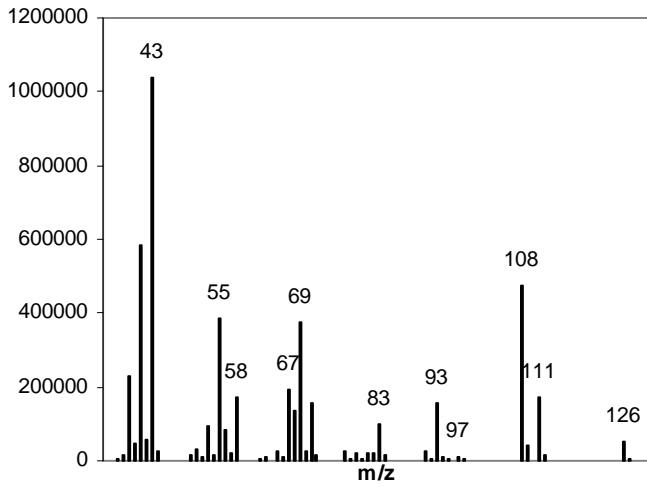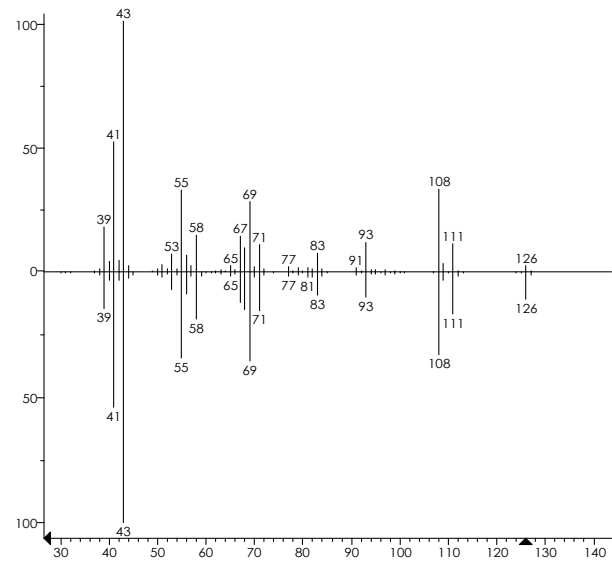

**5-Hepten-2-ol, 6-methyl- (f.c. #118)**

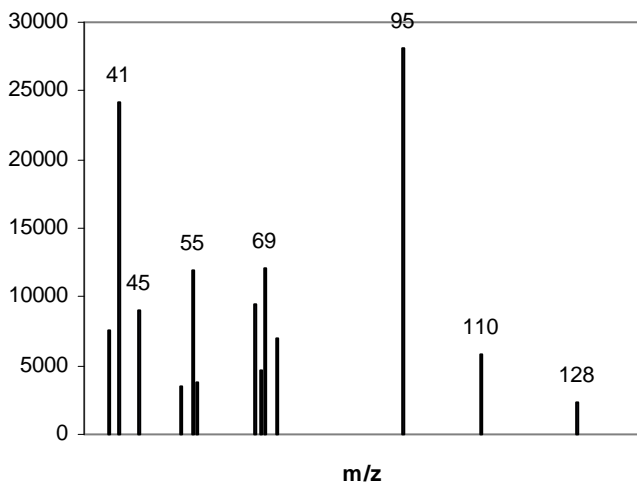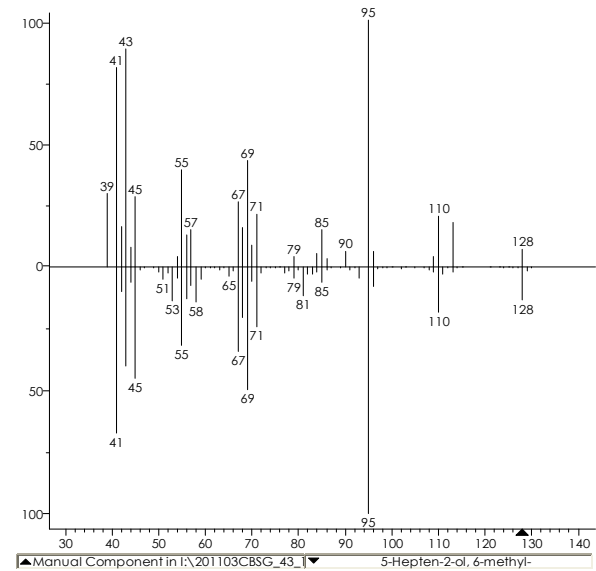

**5-Hexen-2-one, 5-methyl-3-methylene- (f.c. #161)**

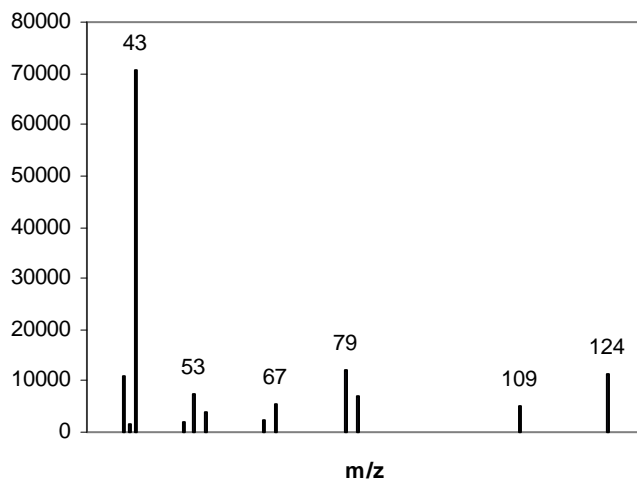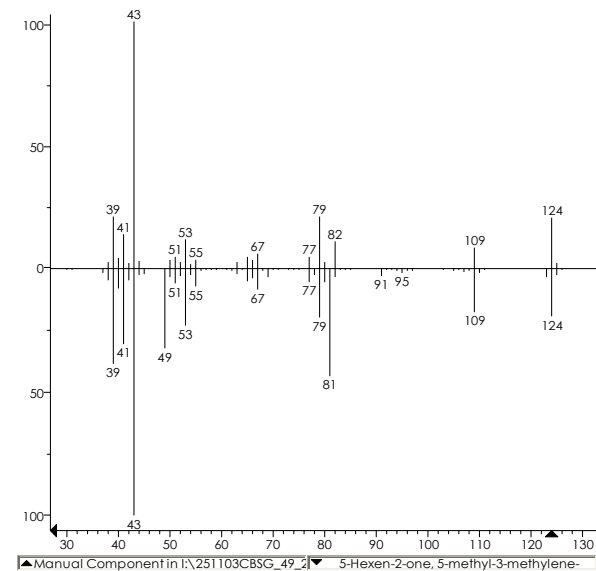

**Acetophenone (f.c. #183)**

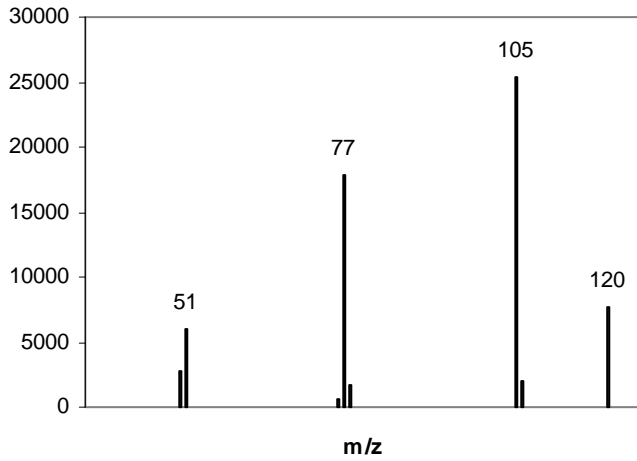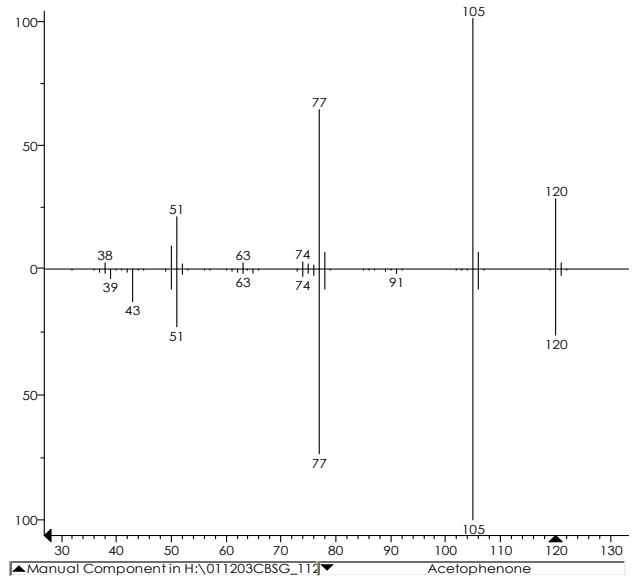

**4'-Methylacetophenone (f.c. #238)**

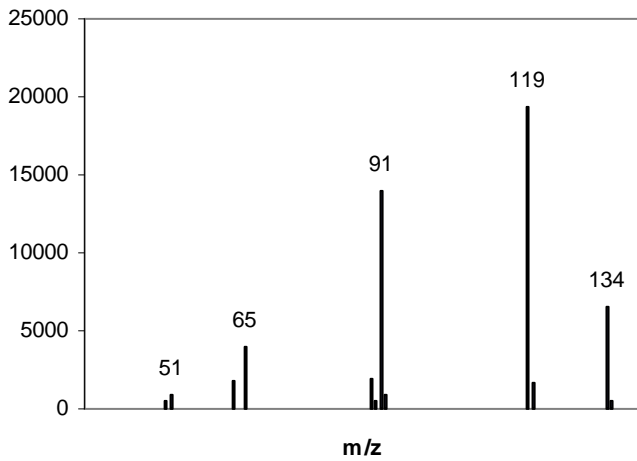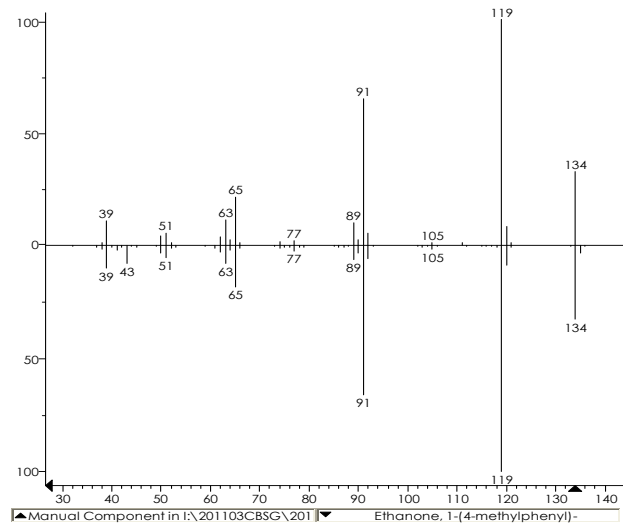

**6-Methyl-3,5-heptadiene-2-one (f.c. #216)**

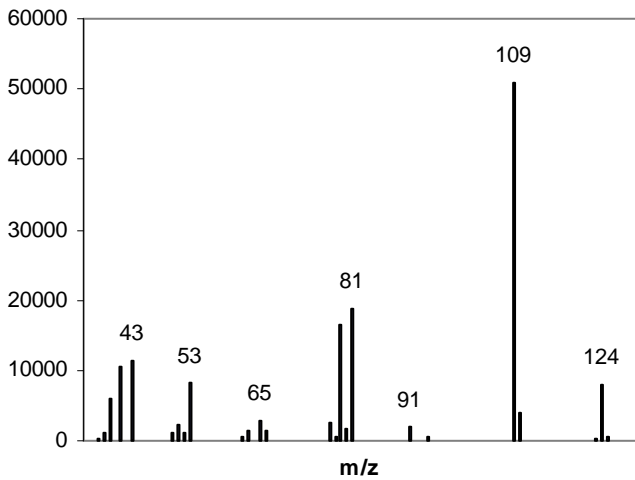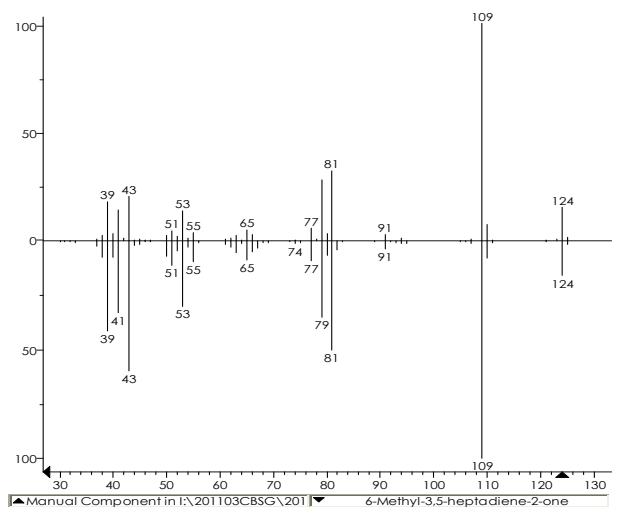

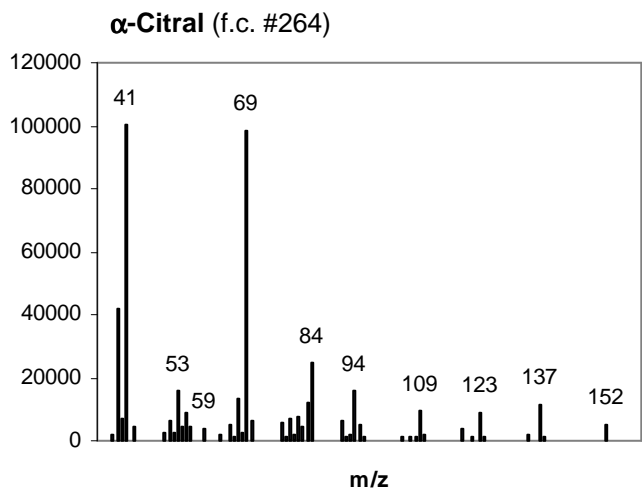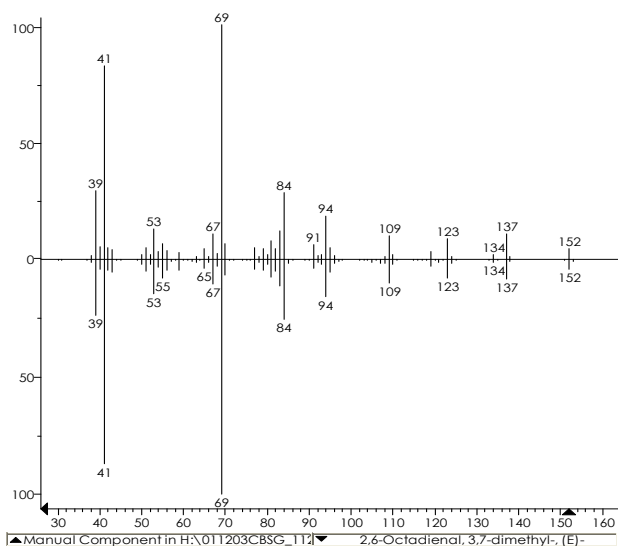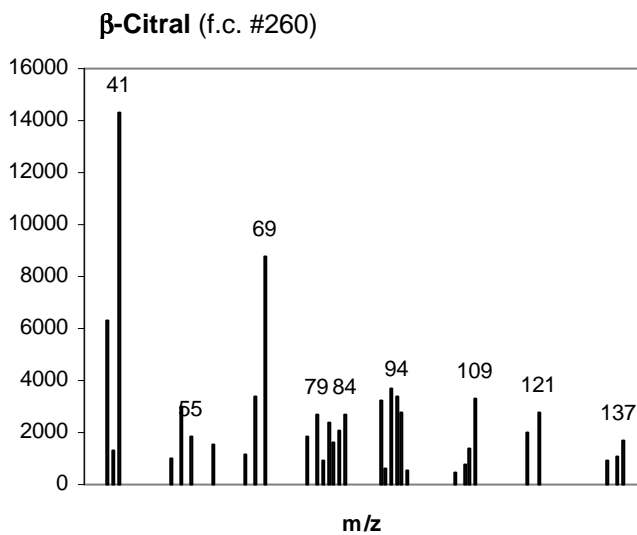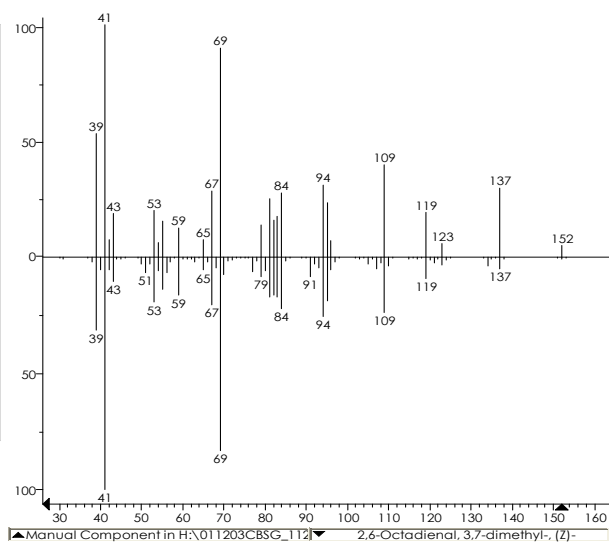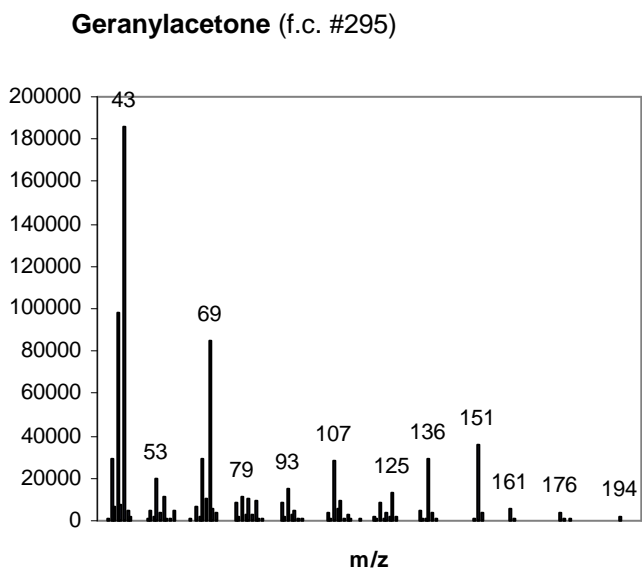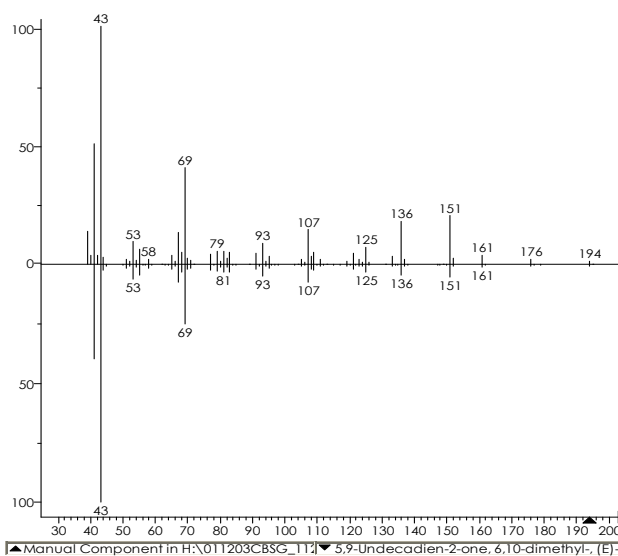

### Pseudoionone (f.c. #303)

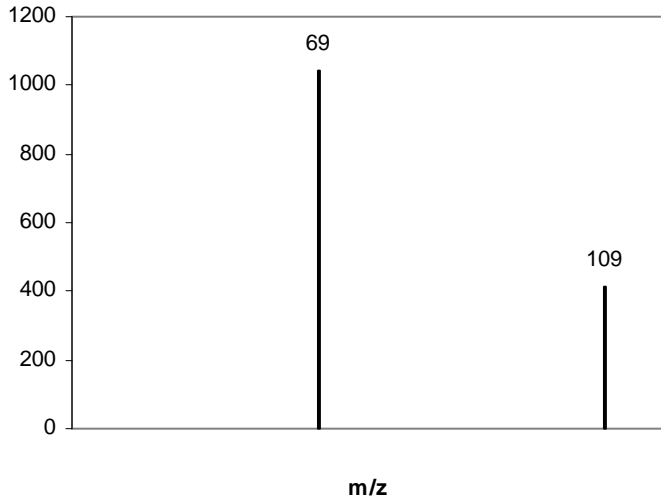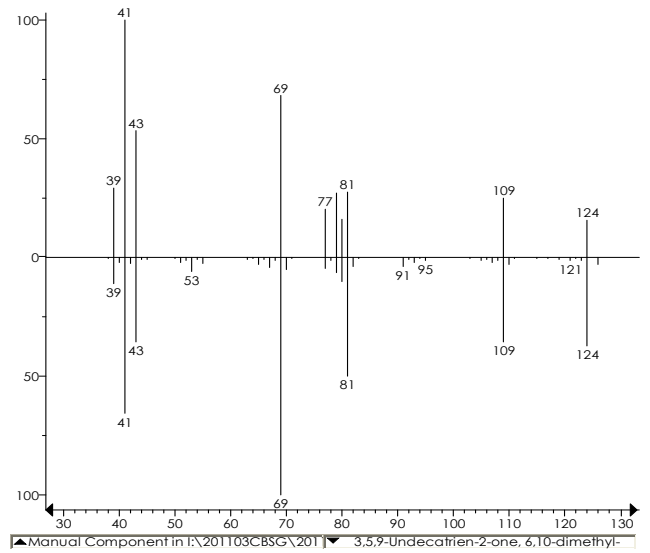

## Terpenoids

### Z-Linalool oxide (f.c. 142)

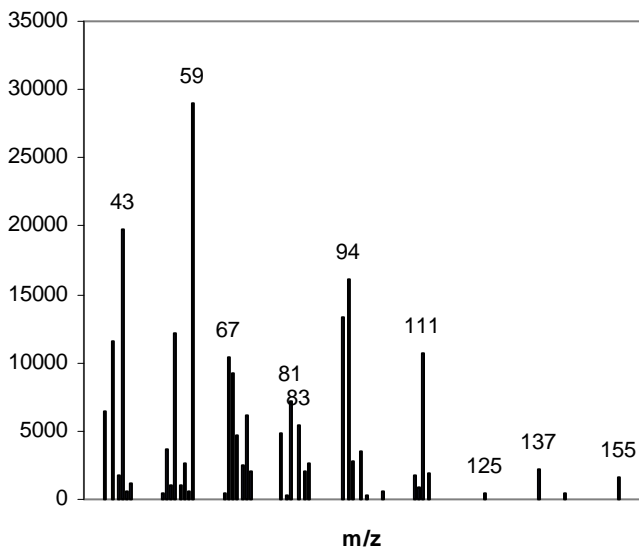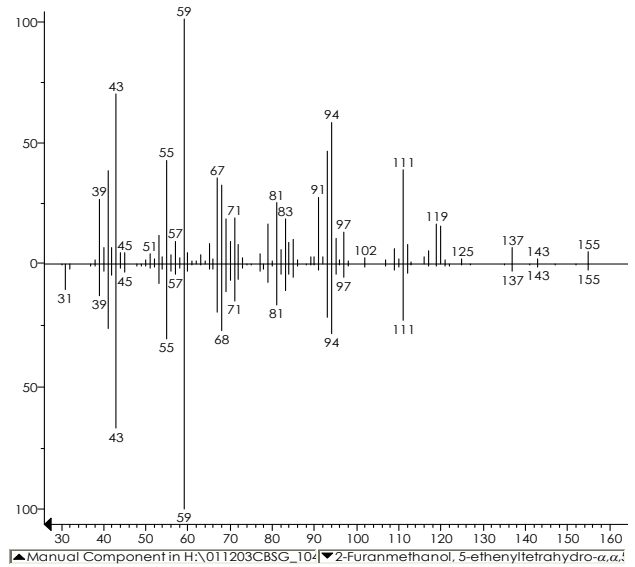

### Limonene (f.c. #142)

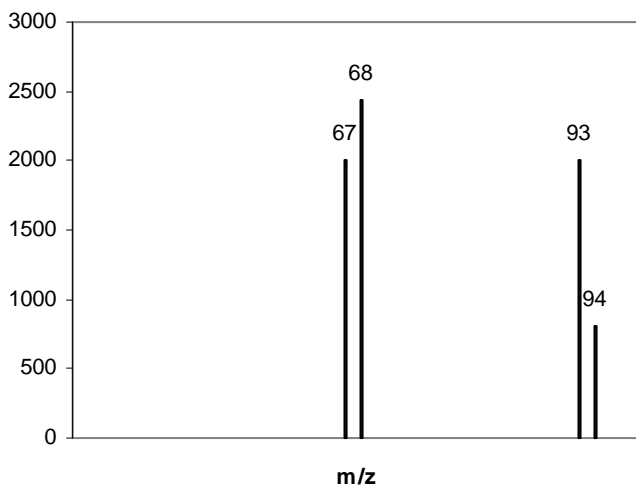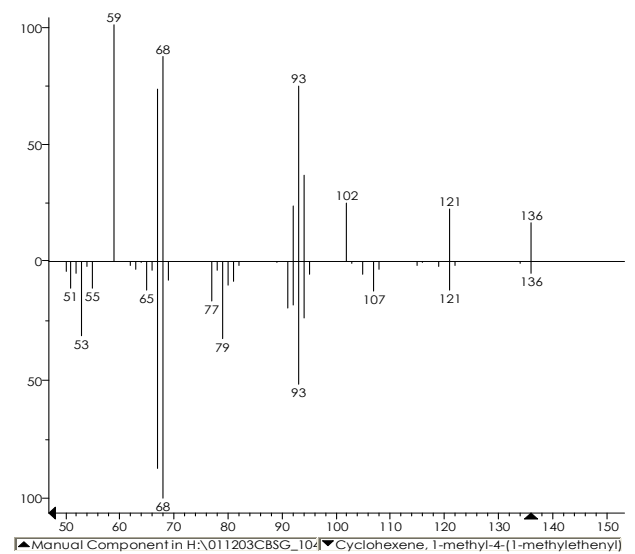

**Ocimenol (f.c. #212)**

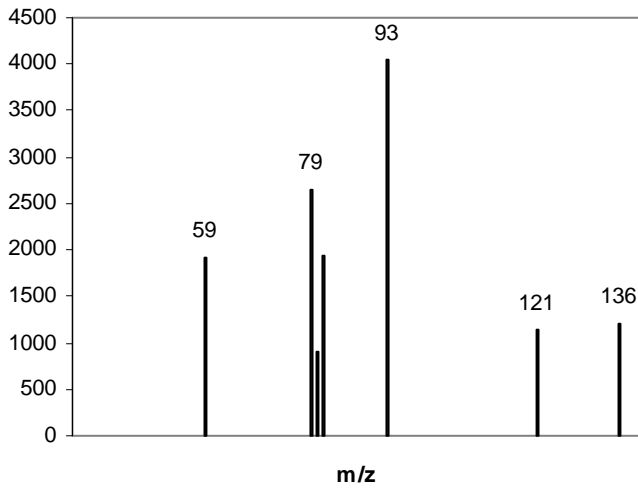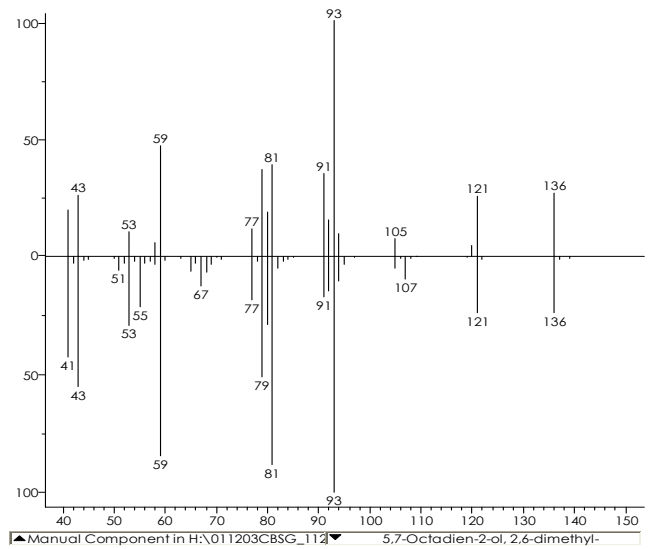

**E-Linalool oxide (f.c. #174)**

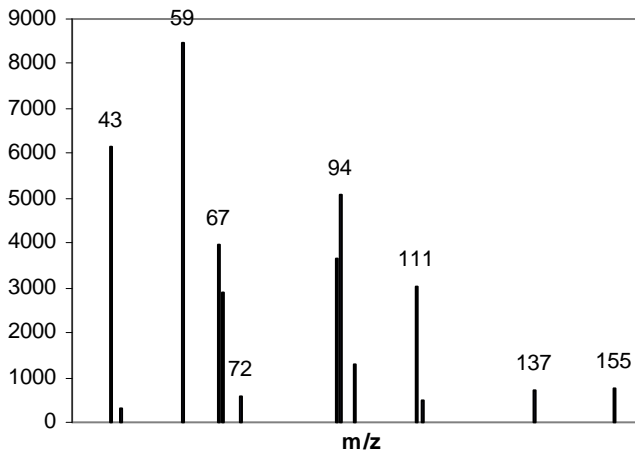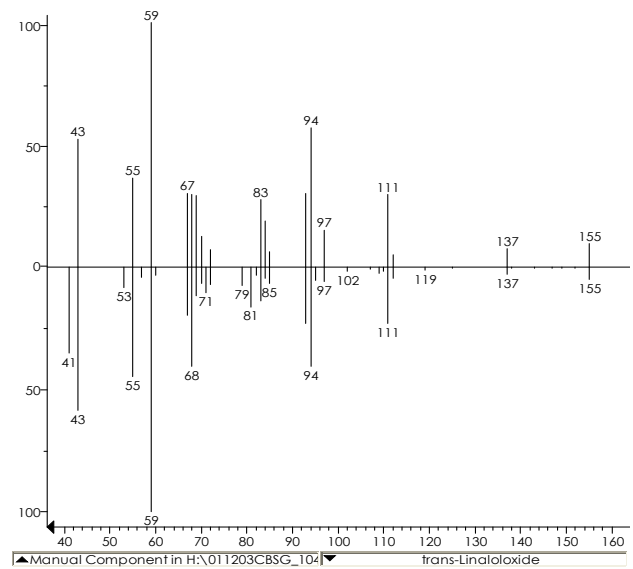

**p-Cimanol-8-ol (f.c. #239)**

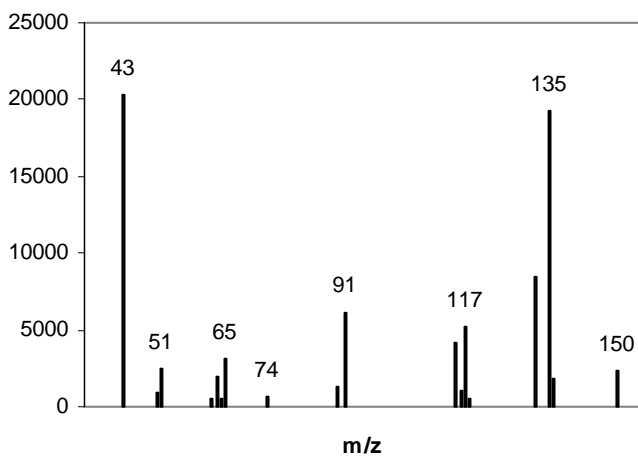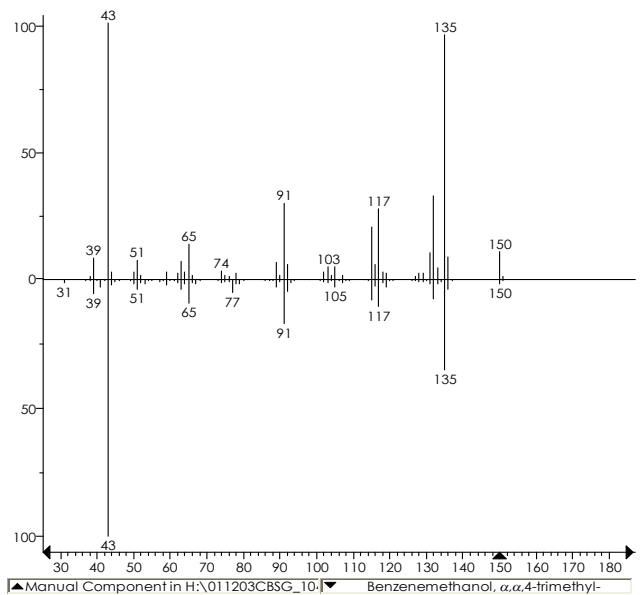

**$\alpha$ -Terpineol (f.c. #240)**

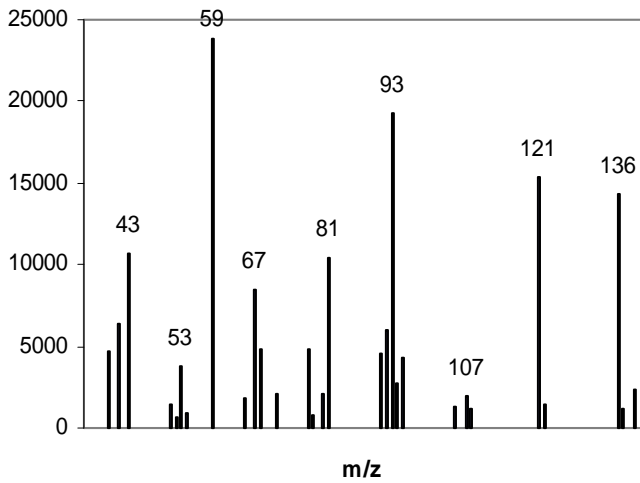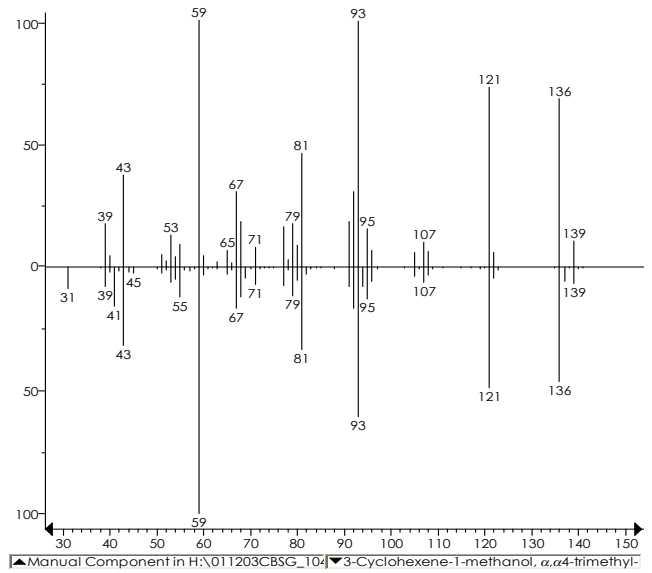

**2-Caren-10-al (f.c. #280)**

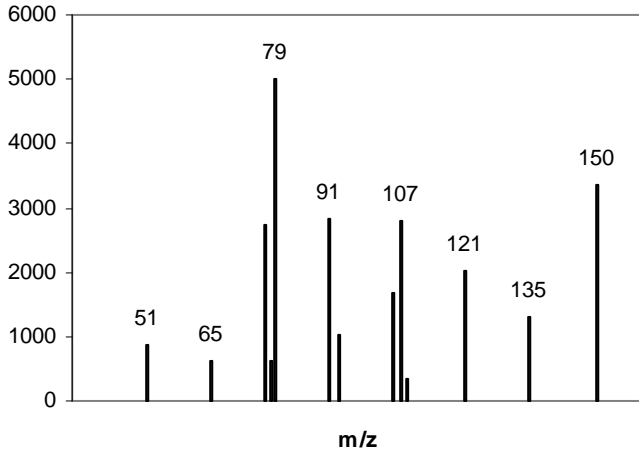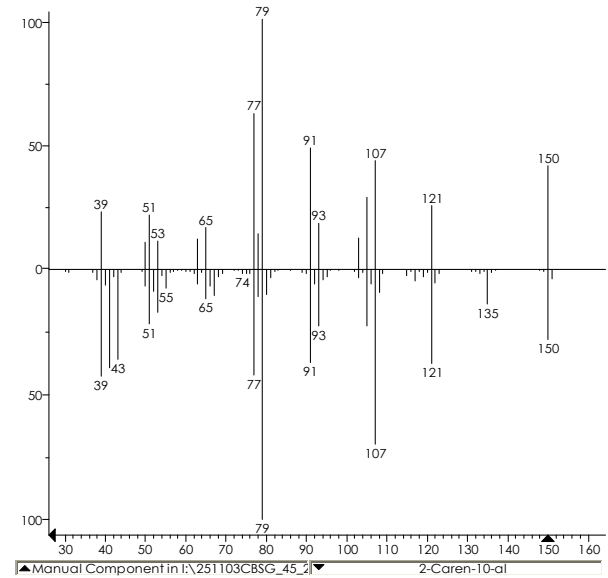

**Cyclic carotenoid derivatives**

**$\alpha$ -Isophoron (f.c. #185)**

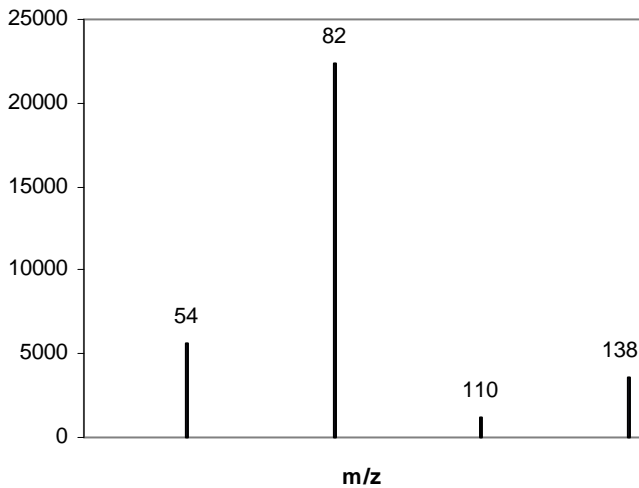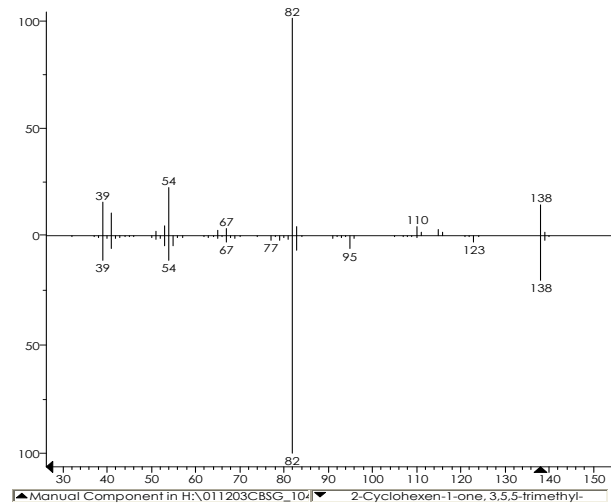

**$\beta$ -Cyclocitral (f.c. #243)**

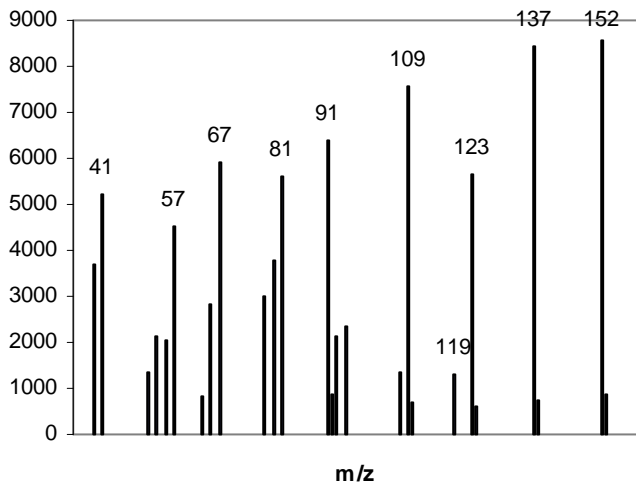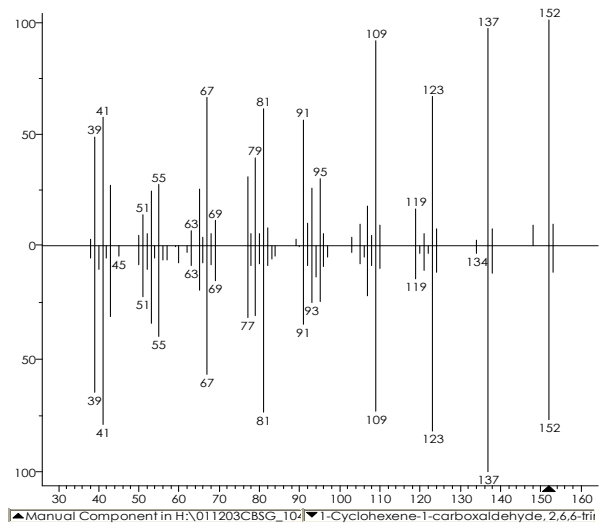

Manual Component in H:\011203CBSEG\_104\1-Cyclohexene-1-carboxaldehyde, 2,6,6-trimethyl

**$\beta$ -Ionone (f.c. #319)**

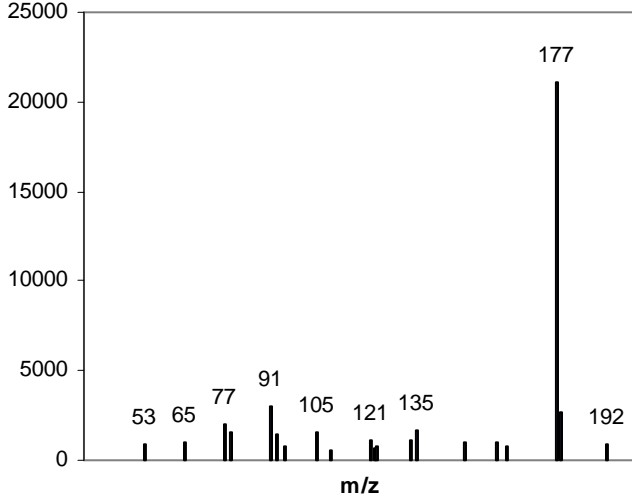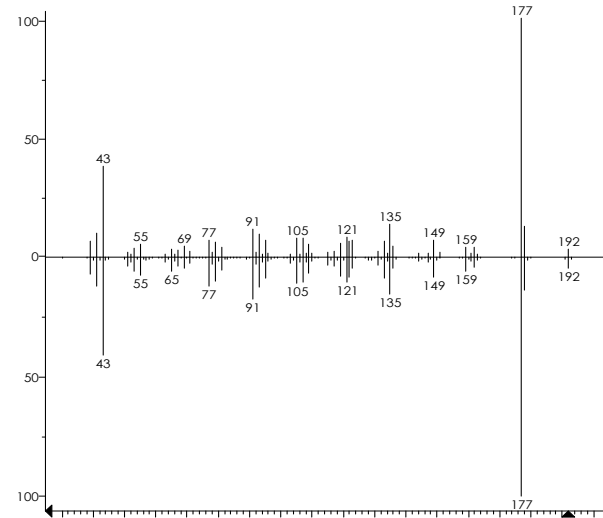

Manual Component in F:\CBSEG3\_VOLATILE\3-Buten-2-one, 4-(2,6,6-trimethyl-1-cyclohexyl)

**$\beta$ -Damascenone (f.c. #316)**

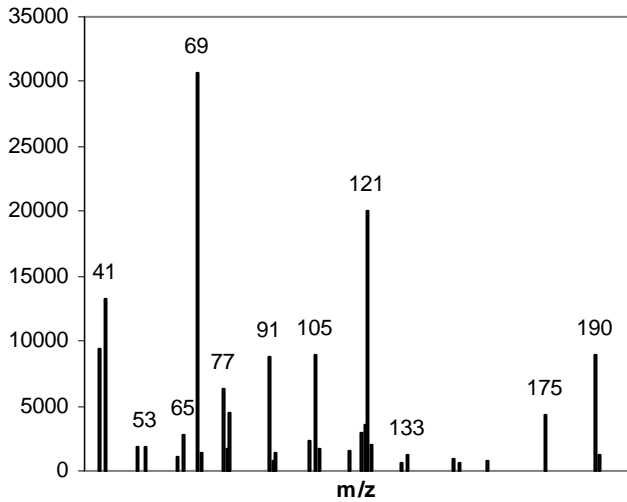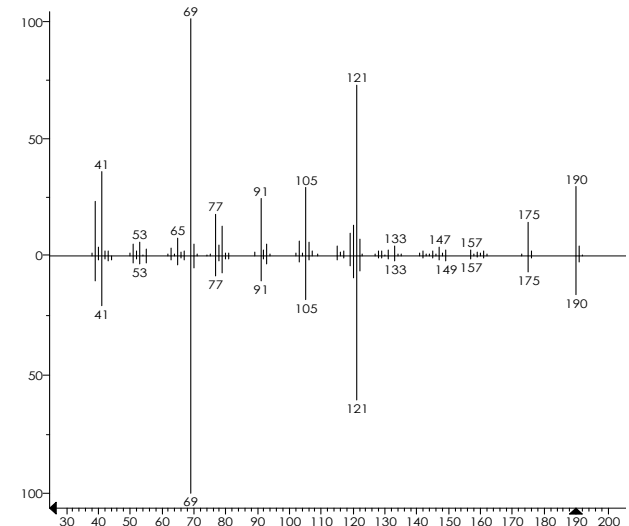

Supplement: plntphys_139_3_1125__2.pdf [file plntphys_139_3_1125__2.pdf]
