# Supplementary material
Source: PubMed Central journal article supplement (PMC1283752)
Supplement: plntphys_139_3_1125__1.pdf [file plntphys_139_3_1125__1.pdf]

**Supplemental data I.** Results of putative identification of 70 volatiles represented in Table 2 of the text. For each compound 5 first matching hits derived from the NIST library are given with corresponding match value and probability. The identity of compounds depicted in bold were confirmed by authentic chemical standards.

| GC/MS data |           |                    | NIST library matching result |                                         |                |
|------------|-----------|--------------------|------------------------------|-----------------------------------------|----------------|
| compound#  | R.T., min | selective ion, m/z | Library hit                  | match value, maximal match value = 1000 | probability, % |

### Phenylpropanoid volatiles

|   |       |     |                                   |            |             |
|---|-------|-----|-----------------------------------|------------|-------------|
| 1 | 21.55 | 122 | <b>Salicylaldehyde</b>            | <b>838</b> | <b>26</b>   |
|   |       |     | Salicylaldehyde                   | 825        | 26          |
|   |       |     | Propanoic acid, 3-chloro-,4-formy | 815        | 18.4        |
|   |       |     | 4-hydroxybenzaldehyde             | 813        | 16.9        |
|   |       |     | 3-hydroxybenzaldehyde             | 810        | 16.9        |
| 2 | 23.06 | 81  | <b>Guaiacol</b>                   | <b>924</b> | <b>73.7</b> |
|   |       |     | Guaiacol                          | 919        | 73.7        |
|   |       |     | Guaiacol                          | 914        | 73.7        |
|   |       |     | p-Guaiacol                        | 892        | 19.8        |
|   |       |     | Guaiacol                          | 888        | 73.7        |
| 3 | 26.89 | 120 | <b>Methyl salicylate</b>          | <b>960</b> | <b>91.2</b> |
|   |       |     | Methyl salicylate                 | 948        | 91.2        |
|   |       |     | Methyl salicylate                 | 943        | 91.2        |
|   |       |     | Methyl salicylate                 | 930        | 91.2        |
|   |       |     | Methyl salicylate                 | 925        | 91.2        |
| 4 | 29.32 | 120 | <b>Ethyl salicylate</b>           | <b>951</b> | <b>96.2</b> |
|   |       |     | Ethyl salicylate                  | 948        | 96.2        |
|   |       |     | Ethyl salicylate                  | 919        | 96.2        |
|   |       |     | 2-ethoxy-benzoic acid             | 801        | 2.7         |
|   |       |     | Ethyl salicylate                  | 769        | 96.2        |
| 5 | 31.9  | 164 | <b>Eugenol</b>                    | <b>920</b> | <b>52.2</b> |
|   |       |     | Eugenol                           | 887        | 52.2        |
|   |       |     | Isoeugenol                        | 886        | 13.4        |
|   |       |     | Eugenol                           | 882        | 52.2        |
|   |       |     | 3-Allyl-6-methoxyphenol           | 881        | 10.8        |

### Phenolic volatiles

|   |       |    |                              |            |             |
|---|-------|----|------------------------------|------------|-------------|
| 6 | 10.79 | 91 | <b>Toluene</b>               | <b>953</b> | <b>31.9</b> |
|   |       |    | 1,3,5-Cycloheptatriene       | 943        | 22.5        |
|   |       |    | Toluene                      | 942        | 31.9        |
|   |       |    | Toluene                      | 936        | 31.9        |
|   |       |    | Cyclobutene, 2-propenylidene | 936        | 32          |
| 7 | 14.45 | 91 | <b>Ethylbenzen</b>           | <b>946</b> | <b>69.5</b> |
|   |       |    | Ethylbenzen                  | 939        | 69.5        |
|   |       |    | Ethylbenzen                  | 922        | 69.5        |
|   |       |    | Ethylbenzen                  | 917        | 69.5        |
|   |       |    | o-Xylene                     | 885        | 11.2        |

*to be continued on the next page*

|    |       |     |                                                                                                                                                                       |                                        |                                             |
|----|-------|-----|-----------------------------------------------------------------------------------------------------------------------------------------------------------------------|----------------------------------------|---------------------------------------------|
| 8  | 15.61 | 104 | <b>Styrene</b><br>Styrene<br>Benzocyclobutane<br>Benzocyclobutane<br>Styrene                                                                                          | <b>964</b><br>963<br>954<br>943<br>939 | <b>44.3</b><br>44.3<br>31.3<br>31.3<br>44.3 |
| 9  | 18.05 | 91  | <b>1-Phenylpropane</b><br>1-Phenylpropane<br>N-Benzyl-2-phenylethylamine<br>Benzylethanolamine<br>Benzylethanolamine                                                  | <b>934</b><br>924<br>900<br>888<br>881 | <b>49.6</b><br>49.6<br>13.5<br>9.01<br>9.01 |
| 10 | 18.34 | 106 | <b>Benzaldehyde</b><br>Benzaldehyde<br>Benzaldehyde<br>Benzaldehyde<br>Phenylglyoxal                                                                                  | <b>944</b><br>924<br>919<br>904<br>827 | <b>72</b><br>72<br>72<br>72<br>4.1          |
| 11 | 18.55 | 94  | <b>Phenol</b><br>Phosphoric acid, (p-hydroxyphen<br>Phenol<br>Phenol<br>Phenol                                                                                        | <b>931</b><br>914<br>911<br>910<br>910 | <b>55</b><br>30<br>55<br>55<br>55           |
| 12 | 19.11 | 118 | <b>o-Methylstyrene</b><br>2-Phenyl-3-buten-1-ol<br>3,5-Diphenyl-1-pentane<br>o-Methylstyrene<br>$\beta$ -Methylstyrene                                                | <b>705</b><br>680<br>671<br>665<br>661 | <b>14.3</b><br>13.2<br>9.57<br>14.3<br>6.76 |
| 13 | 19.24 | 103 | <b>Benzonitrile</b><br>Benzonitrile<br>Benzonitrile<br>Tricyclo [3.1.0.0[2,4]]hex-3-ene-3<br>Benzonitrile                                                             | <b>841</b><br>834<br>825<br>819<br>812 | <b>58.3</b><br>58.3<br>58.3<br>23<br>58.3   |
| 14 | 20.8  | 117 | <b>2-Phenyl-3-buten-1-ol</b><br>Z- $\beta$ -Methylstyrene<br>3,5-Diphenyl-1-pentane<br>Benzen, cyclopropyl<br>Benzocyclopentane                                       | <b>782</b><br>774<br>768<br>768<br>767 | <b>16.4</b><br>12.3<br>5.6<br>4.7<br>1.9    |
| 15 | 20.94 | 108 | <b>Benzyl alcohol</b><br>Benzyl alcohol<br>Benzyl alcohol<br>N-Benzylloxycabonyl-L-tyrosine<br>1-Phenyl-1,2-propanediol                                               | <b>942</b><br>932<br>931<br>914<br>874 | <b>81.6</b><br>81.6<br>81.6<br>4.3<br>1.3   |
| 16 | 21.43 | 120 | <b>Phenylacetaldehyde</b><br>Phenylacetaldehyde<br>Phenylacetaldehyde<br>Phenylacetaldehyde<br>Phtalan                                                                | <b>950</b><br>944<br>920<br>913<br>876 | <b>70.6</b><br>70.6<br>70.6<br>70.6<br>9.4  |
| 17 | 22.09 | 107 | <b>p-Cresol</b><br>p-Cresol<br>m-Cresol<br>p-Cresol<br>p-Cresol                                                                                                       | <b>951</b><br>940<br>936<br>934<br>933 | <b>50.3</b><br>50.3<br>30.5<br>50.3<br>50.3 |
| 18 | 23.63 | 105 | <b><math>\alpha</math>-Phenylpropionaldehyde</b><br>$\alpha$ -Phenylpropionaldehyde<br>$\alpha$ -Methyl styrene oxide<br>1-Nitro-1-phenylethane<br>Toluene, p-propyl- | <b>862</b><br>854<br>821<br>796<br>793 | <b>54.4</b><br>54.4<br>12.4<br>3.78<br>3.34 |

to be continued on the next page

|    |       |     |                                                                                                                                         |                                        |                                             |
|----|-------|-----|-----------------------------------------------------------------------------------------------------------------------------------------|----------------------------------------|---------------------------------------------|
| 19 | 23.95 | 91  | <b>Phenylethanol</b><br>Phenylethanol<br>Phenylethanol<br>Benzyl hyrazide<br>Benzyl hyrazide                                            | <b>944</b><br>928<br>926<br>824<br>820 | <b>87.6</b><br>87.6<br>87.6<br>4.59<br>4.59 |
| 20 | 24.82 | 117 | <b>Phenylacetonitrile</b><br>o-Tolunitrile<br>p-Tolylisonitrile<br>m-Tolunitrile<br>Phenylacetonitrile                                  | <b>856</b><br>827<br>816<br>814<br>812 | <b>43.8</b><br>12.4<br>8.52<br>7.85<br>43.8 |
| 21 | 25.66 | 92  | <b><math>\beta</math>-Phenylpropionaldehyde</b><br>$\beta$ -Phenylpropionaldehyde<br>n-Butylbenzene<br>n-Butylbenzene<br>n-Butylbenzene | <b>876</b><br>832<br>816<br>806<br>806 | <b>46.2</b><br>46.2<br>26.6<br>26.6<br>26.6 |

### Leucine and Isoleucine derived volatiles

|    |       |    |                                                                                                                                               |                                        |                                             |
|----|-------|----|-----------------------------------------------------------------------------------------------------------------------------------------------|----------------------------------------|---------------------------------------------|
| 22 | 6.96  | 44 | <b>Butanal, 3-methyl-</b><br>Butanal, 3-methyl-<br>Butanal, 3-methyl-<br>Butanal, 3-methyl-<br>Pentanal                                       | <b>837</b><br>825<br>793<br>781<br>774 | <b>82.5</b><br>82.5<br>82.5<br>82.5<br>16.7 |
| 23 | 7.21  | 57 | <b>Butanal, 2-methyl-</b><br>Butanal, 2-methyl-<br>Butanal, 2-methyl-<br>1-Propene, 3-ethoxy-<br>Formic acid, 2-propenyl ester                | <b>887</b><br>873<br>853<br>831<br>832 | <b>74.1</b><br>74.1<br>74.1<br>4.73<br>3.81 |
| 24 | 9.32  | 43 | <b>1-Butanol, 3-methyl-</b><br>1-Butanol, 3-methyl-<br>1-Butanol, 3-methyl-<br>2(3H)-Furanone, dihydro-3,5-dim<br>1-Pentanol                  | <b>894</b><br>891<br>873<br>815<br>815 | <b>54.7</b><br>54.7<br>54.7<br>6.23<br>6.23 |
| 25 | 9.5   | 57 | <b>1-Butanol, 2-methyl-</b><br>1-Butanol, 2-methyl-, (S)-<br>1-Butanol, 2-methyl-, ( $\pm$ )-<br>1-Butanol, 2-methyl-<br>1-Butanol, 2-methyl- | <b>922</b><br>897<br>887<br>872<br>870 | <b>62.2</b><br>19<br>13.4<br>62.2<br>62.2   |
| 26 | 9.77  | 42 | 2-Butenal, 2-methyl-, (E)-<br>2-Butenal, 2-methyl-<br>2-Butenal, 2-methyl-<br>2-Butenal, 2-methyl-<br>2-Butenal, 2-methyl-                    | 922<br>913<br>903<br>902<br>892        | 48.4<br>29.4<br>29.4<br>29.4<br>29.4        |
| 27 | 12.77 | 60 | <b>Butanoic acid, 3-methyl-</b><br>Butanoic acid, 3-methyl-<br>Pentanoic acid, 3-methyl-<br>Pentanoic acid, 3-methyl-<br>Hexanoic acid        | <b>922</b><br>908<br>807<br>793<br>768 | <b>91.6</b><br>91.6<br>5.42<br>5.42<br>1.23 |
| 28 | 15.85 | 41 | 3-Methylbutanol nitrite<br>Pentane, 1-nitro-<br>1-Butanol, 2-ethyl-<br>Pentane, 1-nitro-<br>1-Pentanol, 2-methyl-                             | 835<br>800<br>796<br>795<br>788        | 22<br>13.3<br>12.3<br>13.3<br>9.18          |

to be continued on the next page

|    |       |    |                                               |            |             |
|----|-------|----|-----------------------------------------------|------------|-------------|
| 29 | 16.39 | 41 | Cyclopentane, nitro-                          | 778        | 30          |
|    |       |    | 1-Pentene, 5-nitro-                           | 753        | 9.14        |
|    |       |    | Cyclopentanemethanol                          | 752        | 8.78        |
|    |       |    | 1-Butene, 2-methyl-4-[(3-methyl-2-butyl)oxy]- | 733        | 4.26        |
|    |       |    | 2-Buten-1-ol, 3-methyl-, acetate              | 732        | 4.1         |
| 30 | 17.42 | 43 | Amyl nitrite                                  | 917        | 65.3        |
|    |       |    | Pentane, 1-nitro-                             | 897        | 29.8        |
|    |       |    | Pentane, 1-nitro-                             | 884        | 29.8        |
|    |       |    | 1,6-Heptadien-4-ol                            | 759        | 1.05        |
|    |       |    | Hexane, 1-nitro-                              | 748        | 0.72        |
| 31 | 21.04 | 99 | <b>2-Isobutylthiazole</b>                     | <b>902</b> | <b>97.3</b> |
|    |       |    | 2-Isobutylthiazole                            | 894        | 97.3        |
|    |       |    | 2-Isobutylthiazole                            | 839        | 97.3        |
|    |       |    | 2-Isobutylthiazole                            | 811        | 97.3        |
|    |       |    | 2-Propylthiazole                              | 725        | 1.86        |

### Lipid derived volatiles

|    |       |    |                                     |            |             |
|----|-------|----|-------------------------------------|------------|-------------|
| 32 | 13.95 | 82 | <b>Z-3-Hexenol</b>                  | <b>899</b> | <b>32</b>   |
|    |       |    | 3-Hexen-1-ol                        | 897        | 29.5        |
|    |       |    | 3-Hexen-1-ol, (E)-                  | 888        | 21.4        |
|    |       |    | 3-Hexen-1-ol, (Z)-                  | 883        | 32          |
|    |       |    | 3-Hexen-1-ol, (Z)-                  | 883        | 32          |
| 33 | 7.67  | 57 | <b>1-Penten-3-ol</b>                | <b>903</b> | <b>71.7</b> |
|    |       |    | 1-Penten-3-ol                       | 898        | 71.7        |
|    |       |    | 1-Penten-3-ol                       | 893        | 71.7        |
|    |       |    | 1-Penten-3-ol                       | 854        | 71.7        |
|    |       |    | 1-Ethylcyclopropanol                | 821        | 7.31        |
| 34 | 7.83  | 55 | <b>1-Penten-3-one</b>               | <b>882</b> | <b>85.2</b> |
|    |       |    | 1-Penten-3-one                      | 878        | 85.2        |
|    |       |    | 1H-Imidazole, 4,5-dihydro-2-methyl- | 765        | 4.34        |
|    |       |    | 2(5H)-Furanone                      | 751        | 2.89        |
|    |       |    | 2(5H)-Furanone                      | 744        | 2.89        |
| 35 | 8.18  | 44 | <b>Pentanal</b>                     | <b>883</b> | <b>89.6</b> |
|    |       |    | Pentanal                            | 874        | 89.6        |
|    |       |    | Pentanal                            | 862        | 89.6        |
|    |       |    | Butanal, 3-methyl-                  | 777        | 6.02        |
|    |       |    | Butanal, 3-methyl-                  | 774        | 6.02        |
| 36 | 8.37  | 81 | <b>Furan, 2-ethyl-</b>              | <b>934</b> | <b>85.8</b> |
|    |       |    | Furan, 2-ethyl-                     | 907        | 85.8        |
|    |       |    | 2,4-Hexadienal, (E,E)-              | 789        | 2.57        |
|    |       |    | Cyclopentene, 1,5-dimethyl          | 786        | 2.27        |
|    |       |    | Cyclopentene, 4,4-dimethyl-         | 770        | 1.31        |
| 37 | 10.2  | 55 | <b>2-Pentenal, (E)-</b>             | <b>926</b> | <b>50.4</b> |
|    |       |    | 2-Pentenal, (E)-                    | 902        | 50.4        |
|    |       |    | 2-Pentenal, (E)-                    | 882        | 50.4        |
|    |       |    | Cyclobut-1-enylmethanol             | 879        | 10.5        |
|    |       |    | 4-Pentenal                          | 871        | 7.86        |
| 38 | 10.51 | 42 | <b>1-Pentanol</b>                   | <b>895</b> | <b>72.4</b> |
|    |       |    | 1-Pentanol                          | 887        | 72.4        |
|    |       |    | 1-Pentanol                          | 887        | 72.4        |
|    |       |    | 1-Pentanol                          | 872        | 72.4        |
|    |       |    | 1-Pentanol                          | 854        | 72.4        |

to be continued on the next page

|    |       |    |                                                                                                                            |                                        |                                             |
|----|-------|----|----------------------------------------------------------------------------------------------------------------------------|----------------------------------------|---------------------------------------------|
| 39 | 10.65 | 57 | <b>2-Penten-1-ol, (Z)-</b><br>2-Penten-1-ol, (Z)-<br>2-Penten-1-ol, (E)-<br>Cyclopentanol<br>2-Penten-1-ol, (Z)-           | <b>891</b><br>869<br>856<br>854<br>852 | <b>59.1</b><br>59.1<br>14.8<br>13.7<br>59.1 |
| 40 | 11.76 | 80 | <b>3-Hexenal, (Z)-</b><br>4-Pentenal, 2-methyl-<br>2-Hexenal<br>1-Pentene, 2,3-dimethyl-<br>2-Hexenal                      | <b>847</b><br>802<br>787<br>781<br>774 | <b>46.8</b><br>9.97<br>6.04<br>4.75<br>6.04 |
| 41 | 11.83 | 72 | <b>Hexanal</b><br>Hexanal<br>Hexanal<br>Hexanal<br>Cyclobutanol, 2-ethyl-                                                  | <b>856</b><br>843<br>836<br>805<br>716 | <b>91.5</b><br>91.5<br>91.5<br>91.5<br>3.11 |
| 42 | 13.6  | 41 | <b>2-Hexenal</b><br>2-Hexenal<br>2-Hexenal, (E)-<br>2-Hexenal, (E)-<br>2-Hexenal, (E)-                                     | <b>904</b><br>897<br>891<br>896<br>890 | <b>35.6</b><br>35.6<br>23<br>23<br>23       |
| 43 | 13.9  | 98 | <b>2-Hexenal, (E)-</b><br>2-Hexenal, (E)-<br>2-Hexenal, (E)-<br>2-Hexenal<br>2-Hexenal                                     | <b>944</b><br>943<br>940<br>938<br>899 | <b>45.5</b><br>45.5<br>45.5<br>38.5<br>38.5 |
| 44 | 14.36 | 56 | <b>1-Hexanol</b><br>1-Hexanol<br>1-Hexanol<br>1-Hexanol<br>Formic acid                                                     | <b>932</b><br>930<br>928<br>926<br>873 | <b>53.2</b><br>53.2<br>53.2<br>53.2<br>9.62 |
| 45 | 15.75 | 70 | Heptanal<br>Heptanal<br>Heptanal<br>Heptanal<br>Hexanal, 3-methyl-                                                         | 898<br>882<br>871<br>870<br>740        | 92.7<br>92.7<br>92.7<br>92.7<br>2.35        |
| 46 | 16.13 | 81 | <b>2,4-Hexadienal, (E,E)-</b><br>2,4-Hexadienal, (E,E)-<br>2,4-Hexadienal, (E,E)-<br>Furan, 2-ethyl-<br>Furan, 2-ethyl-    | <b>938</b><br>915<br>913<br>878<br>860 | <b>54.2</b><br>54.2<br>54.2<br>9.62<br>9.62 |
| 47 | 17.91 | 41 | <b>2-Heptenal, (E)-</b><br>2-Heptenal, (Z)-<br>2-Heptenal, (E)-<br>4-Pentenal, 2-ethyl-<br>1-Hexene, 3,5-dimethyl-         | <b>952</b><br>895<br>895<br>859<br>845 | <b>66.7</b><br>12.5<br>12.5<br>3.09<br>1.93 |
| 48 | 19.26 | 81 | <b>Furan, 2-pentyl-</b><br>Furan, 2-pentyl-<br>Furan, 2-pentyl-<br>2,4-Nonadienal, (E,E)-<br>2,4-Nonadienal, (E,E)-        | <b>925</b><br>893<br>866<br>780<br>764 | <b>91.3</b><br>91.3<br>91.3<br>2.73<br>2.73 |
| 49 | 19.44 | 81 | <b>2,4-Heptadienal, (E,E)-</b><br>1-Hexyne, 5-methyl-<br>1-Hexyne, 5-methyl-<br>1-Hexyne, 5-methyl-<br>4-Ethylcyclohexanol | <b>721</b><br>713<br>709<br>701<br>688 | <b>31.6</b><br>23.6<br>23.6<br>23.6<br>7.2  |

to be continued on the next page

|    |      |    |                            |            |             |
|----|------|----|----------------------------|------------|-------------|
| 50 | 20.5 | 57 | <b>1-Hexanol, 2-ethyl-</b> | <b>939</b> | <b>65.2</b> |
|    |      |    | 1-Hexanol, 2-ethyl-        | 944        | 65.2        |
|    |      |    | 1-Hexanol, 2-ethyl-        | 926        | 65.2        |
|    |      |    | 1-Hexanol, 2-ethyl-        | 918        | 65.2        |
|    |      |    | 2-Propyl-1-pentanol        | 894        | 14.9        |

### Open chain carotenoid derivatives volatiles

|    |       |     |                                           |            |             |
|----|-------|-----|-------------------------------------------|------------|-------------|
| 51 | 18.99 | 43  | <b>5-Hepten-2-one, 6-methyl-</b>          | <b>919</b> | <b>76.2</b> |
|    |       |     | 5-Hepten-2-one, 6-methyl-                 | 918        | 76.2        |
|    |       |     | 5-Hepten-2-one, 6-methyl-                 | 891        | 76.2        |
|    |       |     | 1-Hepten-6-one, 2-methyl-                 | 882        | 18.6        |
|    |       |     | 3-Hepten-2-one, 5-methyl-                 | 781        | 1.35        |
| 52 | 19.17 | 95  | <b>5-Hepten-2-ol, 6-methyl-</b>           | <b>810</b> | <b>43.5</b> |
|    |       |     | dl-6-Methyl-5-hepten-2-ol                 | 803        | 33.3        |
|    |       |     | 5-Hepten-2-ol, 6-methyl-                  | 793        | 43.5        |
|    |       |     | 5-Hepten-2-ol, 6-methyl-                  | 782        | 43.5        |
|    |       |     | 6-Hepten-1-ol, 2-methyl-                  | 778        | 10.2        |
| 53 | 20.07 | 43  | <b>5-Hexen-2-one, 5-methyl-3-methyl-</b>  | <b>757</b> | <b>27.8</b> |
|    |       |     | Ethanone, 1-(1-cyclohexen-1-yl)-          | 756        | 26.8        |
|    |       |     | Ethanone, 1-(2-methyl-1-cyclohexen-1-yl)- | 749        | 20.5        |
|    |       |     | Ethanone, 1-(1-cyclohexen-1-yl)-          | 727        | 26.8        |
|    |       |     | Ethanone, 1-(1-cyclohexen-1-yl)-          | 727        | 26.8        |
| 54 | 22.32 | 105 | <b>Acetophenone</b>                       | <b>928</b> | <b>53.8</b> |
|    |       |     | Acetophenone                              | 925        | 53.8        |
|    |       |     | Acetophenone                              | 916        | 53.8        |
|    |       |     | Acetophenone                              | 904        | 53.8        |
|    |       |     | Acetophenone                              | 901        | 53.8        |
| 55 | 23.41 | 109 | <b>6-Methyl-3,5-heptadiene-2-one</b>      | <b>916</b> | <b>43.8</b> |
|    |       |     | Ethanone, 1-(2-methyl-1-cyclohexen-1-yl)- | 910        | 34.4        |
|    |       |     | Ethanone, 1-(2-methyl-1-cyclohexen-1-yl)- | 903        | 34.4        |
|    |       |     | 6-Methyl-3,5-heptadiene-2-one             | 893        | 43.8        |
|    |       |     | Ethanone, 1-(2-methyl-1-cyclohexen-1-yl)- | 879        | 34.4        |
| 56 | 26.51 | 119 | <b>Acetophenone, 4'-methyl-</b>           | <b>913</b> | <b>34.6</b> |
|    |       |     | Acetophenone, 4'-methyl-                  | 908        | 34.6        |
|    |       |     | Acetophenone, 3'-methyl-                  | 905        | 25.8        |
|    |       |     | Acetophenone, 3'-methyl-                  | 896        | 25.8        |
|    |       |     | Acetophenone, 3'-methyl-                  | 887        | 25.8        |
| 57 | 28.1  | 69  | <b><math>\beta</math>-Citral</b>          | <b>906</b> | <b>52.1</b> |
|    |       |     | $\beta$ -Citral                           | 887        | 52.1        |
|    |       |     | $\alpha$ -Citral                          | 856        | 20.6        |
|    |       |     | Citral                                    | 791        | 19          |
|    |       |     | $\alpha$ -Citral                          | 785        | 20.6        |
| 58 | 28.98 | 41  | <b><math>\alpha</math>-Citral</b>         | <b>941</b> | <b>67.4</b> |
|    |       |     | $\alpha$ -Citral                          | 927        | 67.4        |
|    |       |     | Citral                                    | 914        | 19.8        |
|    |       |     | Citral                                    | 913        | 19.8        |
|    |       |     | Citral                                    | 906        | 19.8        |
| 59 | 34.36 | 43  | <b>Geranyl acetone</b>                    | <b>907</b> | <b>39</b>   |
|    |       |     | trans-Geranylacetone                      | 904        | 34.5        |
|    |       |     | cis-Geranylacetone                        | 893        | 23.6        |
|    |       |     | trans-Geranylacetone                      | 890        | 39          |
|    |       |     | trans-Geranylacetone                      | 881        | 39          |

to be continued on the next page

|    |       |    |                                 |     |      |
|----|-------|----|---------------------------------|-----|------|
| 60 | 38.06 | 69 | Pseudoionone                    | 711 | 55.9 |
|    |       |    | Pseudoionone                    | 668 | 27.2 |
|    |       |    | 1,4-Hexadiene, 3,3,5-trimethyl- | 616 | 5.42 |
|    |       |    | 1,5-Heptadiene, 2,6-dimethyl-   | 585 | 1.47 |
|    |       |    | 1,5-Heptadiene, 2,6-dimethyl-   | 582 | 1.47 |

## Terpenoids

|    |       |    |                                  |            |             |
|----|-------|----|----------------------------------|------------|-------------|
| 61 | 20.9  | 68 | <b>(-)-Limonene</b>              | <b>626</b> | <b>20.1</b> |
|    |       |    | D-Limonene                       | 617        | 14.6        |
|    |       |    | (±)-Limonene                     | 610        | 11.2        |
|    |       |    | D-Limonene                       | 609        | 14.6        |
|    |       |    | Limonene                         | 608        | 10.3        |
| 62 | 22.44 | 59 | <b>cis-Linalool Oxide</b>        | <b>876</b> | <b>36.7</b> |
|    |       |    | α-Methyl-α-[4-methyl-3-pentenyl] | 866        | 25.9        |
|    |       |    | 2-Furanmethanol, 5-ethenyltetra  | 849        | 14.1        |
|    |       |    | cis-Linalool Oxide               | 847        | 36.7        |
|    |       |    | Linalool oxide                   | 835        | 8.85        |
| 63 | 22.99 | 59 | <b>E-Linaloloxide</b>            | <b>799</b> | <b>26.6</b> |
|    |       |    | Z-Linalool Oxide                 | 793        | 20.9        |
|    |       |    | E-Linaloloxide                   | 792        | 20.1        |
|    |       |    | Z-Linaloloxide                   | 773        | 9.75        |
|    |       |    | Linalool oxide                   | 770        | 8.61        |
| 64 | 24.91 | 93 | Ocimenol                         | <b>821</b> | <b>56.1</b> |
|    |       |    | 4-Thujanol                       | 730        | 4.74        |
|    |       |    | τ-Terpinen                       | 726        | 4           |
|    |       |    | Cyclopropane, 1,1-dimethyl-2-(3- | 722        | 3.38        |
|    |       |    | α-Fenchene                       | 720        | 3.12        |
| 65 | 26.39 | 43 | p-Cymen-8-ol                     | <b>863</b> | <b>87.8</b> |
|    |       |    | p-Cymen-8-ol                     | 855        | 87.8        |
|    |       |    | p-Cymen-8-ol                     | 815        | 87.8        |
|    |       |    | 1-(2,4-Dimethylphenyl)ethanol    | 764        | 6.65        |
|    |       |    | α,2,5-Trimethylbenzyl alcohol    | 741        | 2.43        |
| 66 | 26.69 | 93 | <b>α-Terpineol</b>               | <b>889</b> | <b>41.7</b> |
|    |       |    | α-Terpineol                      | 883        | 24          |
|    |       |    | α-Terpieol                       | 881        | 22.2        |
|    |       |    | α-Terpineol                      | 869        | 41.7        |
|    |       |    | α-Terpieol                       | 864        | 22.2        |
| 67 | 29.92 | 79 | 2-Caren-10-al                    | 718        | 23.2        |
|    |       |    | Benzenemethanol, à-propyl-       | 702        | 13.4        |
|    |       |    | 3-Nonen-5-yne, 4-ethyl-          | 696        | 10.5        |
|    |       |    | 1,3-Cyclohexadiene-1-carboxalde  | 694        | 9.68        |
|    |       |    | 3-Nonen-5-yne, 4-ethyl-, (E)-    | 690        | 8.18        |

## Cyclic carotenoid derivatives

|    |       |    |                                  |     |      |
|----|-------|----|----------------------------------|-----|------|
| 68 | 22.06 | 82 | α-Isophoron                      | 801 | 55.1 |
|    |       |    | α-Isophoron                      | 800 | 55.1 |
|    |       |    | 1H-Pyrazole, 4,5-dihydro-5,5-dim | 791 | 38.9 |
|    |       |    | α-Isophoron                      | 790 | 55.1 |
|    |       |    | α-Isophoron                      | 757 | 55.1 |

to be continued on the next page

|    |       |     |                                       |            |             |
|----|-------|-----|---------------------------------------|------------|-------------|
| 69 | 27.8  | 152 | <b><math>\beta</math>-Cyclocitral</b> | <b>878</b> | <b>59.4</b> |
|    |       |     | $\beta$ -Cyclocitral                  | 870        | 59.4        |
|    |       |     | 3-Isopropylidene-5-methyl-hex-4-      | 825        | 11.7        |
|    |       |     | 3-Cyclohexene-1-carboxaldehyde        | 806        | 5.7         |
|    |       |     | 3-Cyclohexene-1-carboxaldehyde        | 802        | 5.7         |
| 70 | 32.82 | 121 | <b><math>\beta</math>-Damascenone</b> | <b>910</b> | <b>52.8</b> |
|    |       |     | $\beta$ -Damascenone                  | 909        | 52.8        |
|    |       |     | E- $\beta$ -Damascenone               | 906        | 44.6        |
|    |       |     | $\beta$ -Damascenone                  | 893        | 52.8        |
|    |       |     | $\beta$ -Damascenone                  | 891        | 52.8        |
| 72 | 35.74 | 177 | <b><math>\beta</math>-Ionone</b>      | <b>851</b> | <b>43.8</b> |
|    |       |     | E- $\beta$ -Ionone                    | 848        | 38.7        |
|    |       |     | $\beta$ -Ionone                       | 841        | 43.8        |
|    |       |     | E- $\beta$ -Ionone                    | 837        | 38.7        |
|    |       |     | E- $\beta$ -Ionone                    | 815        | 38.7        |
